# Supplementary material for: BF3·OEt2-catalyzed synthesis of 2,2′-spirobi-2H-1-benzopyrans from 2H-chromenes
Source: Royal Society of Chemistry journal article supplement (doi:10.1039/d2ob01286c), 2022-01-01
Supplement: d2ob01286c1.pdf [file d2ob01286c1.pdf]

## **BF<sub>3</sub>.OEt<sub>2</sub>-Catalyzed synthesis of 2,2'-spirobi-2*H*-1-benzopyrans from 2*H*-chromenes**

**Sairam Mudulkar,<sup>a</sup> Sai Teja Kolla,<sup>a</sup> Balasubramanian Sridhar<sup>b</sup> and  
China Raju Bhimapaka<sup>\*a</sup>**

<sup>a</sup>Department of Organic Synthesis & Process Chemistry Division,

<sup>b</sup>Department of Analytical & Structural Chemistry,

CSIR-Indian Institute of Chemical Technology, Hyderabad, 500 007, India.

E-mail: [chinaraju@iict.res.in](mailto:chinaraju@iict.res.in)

## Table of contents

|                                                                                                                                                           |         |
|-----------------------------------------------------------------------------------------------------------------------------------------------------------|---------|
| 1. General Information                                                                                                                                    | S3      |
| 2. Typical procedure for the synthesis of<br>2,2'-spirobi-2 <i>H</i> -1-benzopyrans and characterization data of compounds<br><b>3a-i, 3k, 3m-p, 3s-u</b> | S3-S11  |
| 4. Copies of <sup>1</sup> H-NMR, <sup>13</sup> C-NMR and HRMS Spectrum of compounds<br><b>3a-i, 3k, 3m-p, 3s-u</b>                                        | S12-S44 |
| 5. X-ray crystallography data of compound <b>3c</b>                                                                                                       | S45     |
| 6. Response to the Reviewers about suggested experiments                                                                                                  | S46-47  |

**1. General information:** Salicylaldehydes,  $\beta$ -ketoesters, 4 Å molecular sieves and Boron trifluoride diethyl etherate were procured from Sigma-Aldrich. General chemicals and solvents were obtained from local suppliers. All the reactions were carried at  $-78\text{ }^{\circ}\text{C}$  to room temperature, monitored by thin layer chromatography (TLC) on pre-coated silica gel 60 F254 (mesh) and spots were visualized under UV light. Merck silica gel (60-120, 100-200 mesh) was used for column chromatography.  $^1\text{H}$  NMR and  $^{13}\text{C}$  NMR spectra were recorded on an Avance 300, 400, 500 MHz spectrometers in  $\text{CDCl}_3$  using TMS as internal standard. IR spectra were recorded on Nicolet Nexus 670 FT spectrometer. ESI-MS obtained on quarto micro spectrometer. HRMS were measured on Agilent Technologies 6510, Q-TOFLC/MS ESI-Technique. Melting points were determined in open glass capillary tubes on a Stuart melting point apparatus and are uncorrected.

**2. Typical procedure for the synthesis of 2,2'-spirobi-2H-1-benzopyran (3a):** Boron trifluoride diethyl etherate (0.25 mL, 2.0 mmol) was added dropwise to a stirred solution of ethyl 2-(chloromethyl)-2-hydroxy-2H-chromene-3-carboxylate (**1a**, 0.268 g, 1.0 mmol) in dry  $\text{CH}_2\text{Cl}_2$  (4 mL) at  $-78\text{ }^{\circ}\text{C}$  under nitrogen atmosphere in presence of 4 Å molecular sieves. The reaction mixture was turned to lemon yellow colour was observed from colourless. Then, salicylaldehyde (**2a**, 0.122 g, 1.0 mmol) in dry  $\text{CH}_2\text{Cl}_2$  (2 mL) was added slowly at the same temperature and stirring was continued for 30 minutes. The contents were slowly brought to room temperature and monitored by TLC. After completion of the reaction (8h, TLC), the reaction mixture was quenched with cold water and extracted with diethyl ether (3 x 10 mL). The layers were separated, the organic layer was dried over  $\text{Na}_2\text{SO}_4$  and solvent was removed under reduced pressure. The crude product was subjected to column chromatography purification afforded ethyl 3'-chloro-2,2'-spirobi[chromene]-3-carboxylate (**3a**, 0.26 g, 74% yield) as colourless solid.

**Ethyl 3'-chloro-2,2'-spirobi[chromene]-3-carboxylate (3a):**

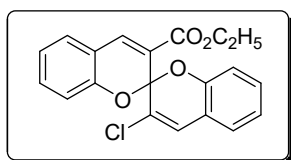

Yield: 74%, Colourless solid, m.p.  $144\text{-}146\text{ }^{\circ}\text{C}$ .  $^1\text{H}$  NMR (300 MHz,  $\text{CDCl}_3$ ):  $\delta$  7.93 (s, 1H), 7.34 (dd,  $J = 12.7, 4.6$  Hz, 2H), 7.2-7.15 (m, 2H), 7.09-6.99 (m, 2H), 6.96 (s, 1H), 6.90 (d,  $J = 8.1$  Hz, 1H), 6.84 (d,  $J = 8.0$  Hz, 1H), 4.35-4.17 (m, 2H), 1.28-1.24 (m, 3H) ppm.  $^{13}\text{C}$  NMR

(125 MHz, CDCl<sub>3</sub>):  $\delta$  163.78, 151.10, 148.77, 136.17, 132.77, 129.61, 128.91, 126.31, 126.26, 123.78, 122.42, 122.34, 121.30, 119.52, 117.92, 116.71, 116.34, 99.21, 61.14, 13.97 ppm. FT-IR (KBr): 3087, 2977, 2925, 1709, 1635, 1604, 1482, 1380, 1233, 1210, 1033, 930, 761 cm<sup>-1</sup>. HRMS (ESI):  $m/z$  calcd for C<sub>20</sub>H<sub>16</sub>O<sub>4</sub>Cl [M+H]<sup>+</sup>: 355.0732; found: 355.0742.

**Ethyl 3'-chloro-8'-methyl-2,2'-spirobi[chromene]-3-carboxylate (3b):**

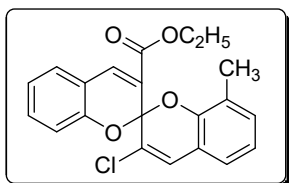

Yield: 65%, Colourless solid. m.p.: 104-106 °C. <sup>1</sup>H NMR (400 MHz, CDCl<sub>3</sub>):  $\delta$  7.93 (s, 1H), 7.38-7.31 (m, 2H), 7.06 (td,  $J$  = 7.5, 1.0 Hz, 2H), 7.03-7.00 (m, 1H), 6.94 (d,  $J$  = 1.5 Hz, 1H), 6.94-6.87 (m, 2H), 4.27 (dd,  $J$  = 17.1, 7.1 Hz, 2H), 1.99 (s, 3H), 1.28 (t,  $J$  = 7.1 Hz, 3H) ppm. <sup>13</sup>C NMR (125 MHz, CDCl<sub>3</sub>):  $\delta$  163.90, 151.16, 146.80, 136.21, 132.64, 131.12, 128.82, 126.04, 125.80, 124.15, 124.04, 122.34, 121.89, 121.66, 119.25, 118.10, 116.74, 99.25, 61.11, 15.25, 13.99 ppm. FT-IR (KBr): 2901, 1706, 1639, 1608, 1487, 1375, 1292, 1209, 1124, 1038, 926, 806 cm<sup>-1</sup>. HRMS (ESI):  $m/z$  calcd for C<sub>21</sub>H<sub>18</sub>O<sub>4</sub>Cl [M+H]<sup>+</sup>: 369.0888; found: 369.0879.

**Ethyl 3'-chloro-6'-methyl-2,2'-spirobi[chromene]-3-carboxylate (3c):**

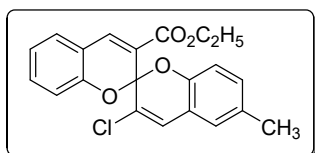

Yield: 70%, Colourless solid. m.p.: 148-150 °C. <sup>1</sup>H NMR (400 MHz, CDCl<sub>3</sub>):  $\delta$  7.92 (s, 1H), 7.38-7.31 (m, 2H), 7.06 (td,  $J$  = 7.5, 0.8 Hz, 1H), 7.00 (dd,  $J$  = 11.8, 3.6 Hz, 2H), 6.89 (d,  $J$  = 10.2 Hz, 2H), 6.73 (d,  $J$  = 8.2 Hz, 1H), 4.34-4.18 (m, 2H), 2.31 (s, 3H), 1.27 (t,  $J$  = 7.1 Hz, 3H) ppm. <sup>13</sup>C NMR (125 MHz, CDCl<sub>3</sub>):  $\delta$  163.81, 151.16, 146.67, 136.13, 132.71, 131.68, 130.22, 128.89, 126.55, 126.26, 123.83, 122.35, 121.40, 119.28, 117.96, 116.71, 116.05, 99.24, 61.11, 20.57, 13.97 ppm. FT-IR (KBr): 2922, 1705, 1639, 1607, 1487, 1374, 1293, 1209, 1123, 1037, 926, 804 cm<sup>-1</sup>. HRMS (ESI):  $m/z$  calcd for C<sub>21</sub>H<sub>18</sub>O<sub>4</sub>Cl [M+H]<sup>+</sup>: 369.0888; found: 369.0906.

**Ethyl 6',8'-di-tert-butyl-3'-chloro-2,2'-spirobi[chromene]-3-carboxylate (3d):**

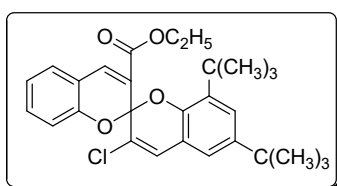

Yield: 65%, Colourless solid. m.p.: 156-158 °C. <sup>1</sup>H NMR (500 MHz, CDCl<sub>3</sub>): δ 7.93 (s, 1H), 7.37 (dd, *J* = 7.6, 1.4 Hz, 1H), 7.32-7.27 (m, 1H), 7.24 (d, *J* = 2.3 Hz, 1H), 7.05-7.01 (m, 2H), 6.94 (s, 1H), 6.86 (d, *J* = 8.2 Hz, 1H), 4.33-4.20 (m, 2H), 1.31 (s, 9H), 1.27 (t, *J* = 7.1 Hz, 3H), 1.09 (s, 9H) ppm. <sup>13</sup>C NMR (100 MHz, CDCl<sub>3</sub>): δ 163.91, 151.53, 144.86, 144.22, 136.85, 136.00, 132.65, 128.76, 125.11, 125.00, 124.56, 122.26, 121.89, 121.62, 121.62, 119.39, 118.22, 116.75, 99.05, 61.05, 34.63, 34.43, 31.54, 29.62, 14.07 ppm. FT-IR (KBr): 3060, 2958, 1712, 1637, 1609, 1377, 1294, 1212, 1123, 1038, 932, 759 cm<sup>-1</sup>. HRMS (ESI): *m/z* calcd for C<sub>28</sub>H<sub>31</sub>O<sub>4</sub>ClNa [M+Na]<sup>+</sup>: 489.1803; found: 489.1793.

**Ethyl 8'-allyl-3'-chloro-2,2'-spirobi[chromene]-3-carboxylate (3e):**

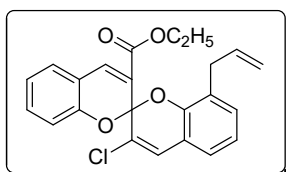

Yield: 58%, Colourless solid. m.p.: 112-114 °C. <sup>1</sup>H NMR (400 MHz, CDCl<sub>3</sub>): δ 7.93 (s, 1H), 7.38-7.30 (m, 2H), 7.08-7.03 (m, 3H), 6.99-6.93 (m, 2H), 6.86 (d, *J* = 8.2 Hz, 1H), 5.64-5.54 (m, 1H), 4.73 (ddd, *J* = 17.0, 3.3, 1.6 Hz, 1H), 4.63 (dd, *J* = 10.0, 1.7 Hz, 1H), 4.34-4.19 (m, 2H), 3.23 (dd, *J* = 15.0, 6.9 Hz, 1H), 3.06 (dd, *J* = 15.0, 6.5 Hz, 1H), 1.28 (t, *J* = 7.1 Hz, 3H) ppm. <sup>13</sup>C NMR (100 MHz, CDCl<sub>3</sub>): δ 163.90, 151.24, 146.46, 136.30, 135.84, 132.63, 130.33, 128.82, 128.00, 126.22, 124.63, 124.18, 122.42, 122.20, 121.65, 119.61, 118.17, 116.91, 115.43, 99.22, 61.15, 34.01, 14.04 ppm. FT-IR (KBr): 2925, 1709, 1635, 1606, 1453, 1377, 1293, 1211, 1125, 1029, 918, 775 cm<sup>-1</sup>. HRMS (ESI): *m/z* calcd for C<sub>23</sub>H<sub>19</sub>O<sub>4</sub>ClNa [M+Na]<sup>+</sup>: 417.0864; found: 417.0848.

**Ethyl 3'-chloro-6'-methoxy-2,2'-spirobi[chromene]-3-carboxylate (3f):**

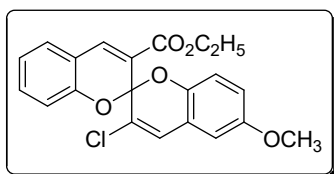

Yield: 72%, Colourless solid. m.p.: 116-118 °C. <sup>1</sup>H NMR (400 MHz, CDCl<sub>3</sub>): δ 7.92 (s, 1H), 7.38-7.31 (m, 2H), 7.06 (td, *J* = 7.5, 0.8 Hz, 1H), 6.93-6.87 (m, 2H), 6.77 (t, *J* = 5.0 Hz, 2H), 6.71 (d, *J* = 1.0 Hz, 1H), 4.34-4.19 (m, 2H), 3.78 (s, 3H), 1.28 (t, *J* = 7.1 Hz, 3H) ppm. <sup>13</sup>C NMR (100 MHz, CDCl<sub>3</sub>): δ 163.81, 154.77, 151.18, 142.83, 136.17, 132.73, 128.92, 127.17, 123.76, 122.38, 121.38, 120.03, 117.99, 117.08, 116.75, 115.42, 110.69, 99.25, 61.14, 55.79, 14.00 ppm. FT-IR (KBr): 3057, 2928, 1708, 1635, 1607, 1490, 1374, 1289, 1212, 1124, 1041, 927, 757 cm<sup>-1</sup>. HRMS (ESI): *m/z* calcd for C<sub>21</sub>H<sub>18</sub>O<sub>5</sub>Cl [M+H]<sup>+</sup>: 385.0837; found: 385.0813.

**Ethyl 3'-chloro-7'-methoxy-2,2'-spirobi[chromene]-3-carboxylate (3g):**

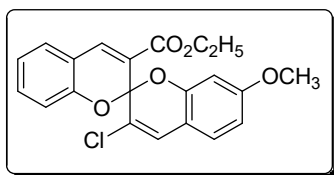

Yield: 52%, Colourless solid. m.p.: 124-126 °C. <sup>1</sup>H NMR (500 MHz, CDCl<sub>3</sub>): δ 7.92 (s, 1H), 7.36 (t, *J* = 8.0 Hz, 2H), 7.07 (t, *J* = 7.4 Hz, 2H), 6.94-6.88 (m, 2H), 6.59 (dd, *J* = 8.4, 1.9 Hz, 1H), 6.41 (s, 1H), 4.34-4.20 (m, 2H), 3.73 (s, 3H), 1.27 (t, *J* = 7.1 Hz, 3H) ppm. <sup>13</sup>C NMR (100 MHz, CDCl<sub>3</sub>): δ 163.83, 161.08, 151.15, 150.04, 136.12, 132.75, 128.91, 127.04, 123.52, 123.29, 122.41, 121.47, 117.96, 116.79, 112.84, 109.08, 101.62, 89.34, 61.14, 55.41, 13.99. FT-IR (KBr): 3054, 2985, 2929, 1707, 1635, 1607, 1491, 1374, 1258, 1211, 1044, 931, 755 cm<sup>-1</sup>. HRMS (ESI): *m/z* calcd for C<sub>21</sub>H<sub>17</sub>O<sub>5</sub>ClNa [M+Na]<sup>+</sup>: 407.0657; found: 407.0643.

**Ethyl 3'-chloro-8'-fluoro-2,2'-spirobi[chromene]-3-carboxylate (3h):**

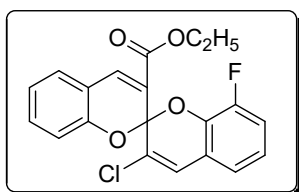

Yield: 69%, Colourless solid. m.p.: 140-142 °C. <sup>1</sup>H NMR (400 MHz, CDCl<sub>3</sub>): δ 7.96 (s, 1H), 7.36 (t, *J* = 7.4 Hz, 2H), 7.08 (t, *J* = 7.2 Hz, 1H), 7.03-6.96 (m, 2H), 6.97-6.92 (m, 3H), 6.91 (d, *J* = 8.4 Hz, 1H), 4.34-4.21 (m, 2H), 1.28 (t, *J* = 7.1 Hz, 3H) ppm. <sup>13</sup>C NMR (100 MHz, CDCl<sub>3</sub>): δ 163.66, 152.12, 150.93, 149.67, 136.76, 132.99, 129.13, 127.57, 123.19, 122.71, 122.18, 122.11, 121.86, 121.49, 120.66, 117.76, 116.68, 99.16, 61.24, 14.04 ppm. FT-IR (KBr): 3068, 2982, 1707, 1640, 1609, 1475, 1377, 1295, 1234, 1209, 1125, 1031, 915, 773 cm<sup>-1</sup>. HRMS (ESI): *m/z* calcd for C<sub>20</sub>H<sub>14</sub>O<sub>4</sub>ClFNa [M+Na]<sup>+</sup>: 395.0457; found: 395.0456.

**Ethyl 3',6'-dichloro-2,2'-spirobi[chromene]-3-carboxylate (3i):**

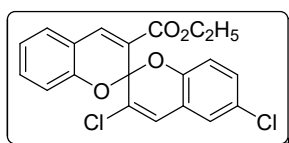

Yield: 68%, Colourless solid. m.p.: 190-192 °C. <sup>1</sup>H NMR (400 MHz, CDCl<sub>3</sub>): δ 7.93 (s, 1H), 7.36 (t, *J* = 7.4 Hz, 2H), 7.17-7.13 (m, 2H), 7.08 (t, *J* = 7.4 Hz, 1H), 6.90 (d, *J* = 8.7 Hz, 2H), 6.78 (d, *J* = 8.6 Hz, 1H), 4.33-4.20 (m, 2H), 1.28 (t, *J* = 7.1 Hz, 3H) ppm. <sup>13</sup>C NMR (100 MHz, CDCl<sub>3</sub>): δ 163.65, 150.95, 147.28, 136.35, 132.92, 129.28, 128.99, 127.84, 127.27, 125.69, 122.73, 122.62, 120.99, 120.86, 117.82, 117.74, 116.67, 99.25, 61.23, 14.00 ppm. FT-IR (KBr): 2926, 1702, 1642, 1606, 1479, 1377, 1294, 1212, 1124, 1039, 930, 753 cm<sup>-1</sup>. HRMS (ESI): *m/z* calcd for C<sub>20</sub>H<sub>14</sub>O<sub>4</sub>Cl<sub>2</sub>Na [M+Na]<sup>+</sup>: 411.0161; found: 411.0130.

**Ethyl 6'-bromo-3'-chloro-2,2'-spirobi[chromene]-3-carboxylate (3k):**

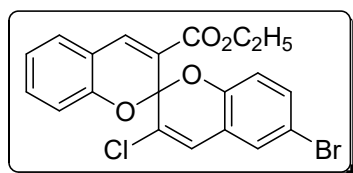

Yield: 70%, Colourless solid. m.p.: 196-198 °C. <sup>1</sup>H NMR (400 MHz, CDCl<sub>3</sub>): δ 7.93 (s, 1H), 7.36 (dd, *J* = 11.6, 4.5 Hz, 2H), 7.30-7.27 (m, 2H), 7.10-7.05 (m, 1H), 6.89 (d, *J* = 10.8 Hz,

2H), 6.73 (d,  $J = 8.2$  Hz, 1H), 4.33-4.20 (m, 2H), 1.27 (t,  $J = 7.1$  Hz, 3H) ppm.  $^{13}\text{C}$  NMR (125 MHz,  $\text{CDCl}_3$ ):  $\delta$  163.63, 150.92, 147.79, 136.35, 132.92, 132.18, 128.98, 128.60, 127.78, 122.62, 121.37, 120.97, 118.16, 117.80, 116.66, 114.51, 99.24, 61.22, 13.99 ppm. FT-IR (KBr): 3068, 2926, 1701, 1642, 1604, 1477, 1375, 1293, 1210, 1122, 1038, 930, 7754  $\text{cm}^{-1}$ . HRMS (ESI):  $m/z$  calcd for  $\text{C}_{20}\text{H}_{14}\text{O}_4\text{ClBrNa}$   $[\text{M}+\text{Na}]^+$ : 454.9656; found: 454.9641.

**Ethyl 3'-chloro-6'-phenyl-2,2'-spirobi[chromene]-3-carboxylate (3m):**

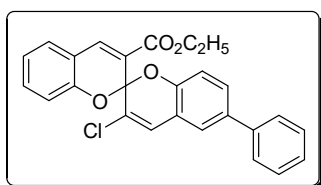

Yield: 76%, Colourless solid. m.p.: 156-158  $^{\circ}\text{C}$ .  $^1\text{H}$  NMR (500 MHz,  $\text{CDCl}_3$ ):  $\delta$  7.94 (s, 1H), 7.54 (d,  $J = 7.3$  Hz, 2H), 7.46-7.40 (m, 3H), 7.40-7.31 (m, 4H), 7.07 (t,  $J = 7.4$  Hz, 1H), 7.02 (s, 1H), 6.94-6.88 (m, 2H), 4.32-4.22 (m, 2H), 1.28 (t,  $J = 7.1$  Hz, 3H) ppm.  $^{13}\text{C}$  NMR (100 MHz,  $\text{CDCl}_3$ ):  $\delta$  163.82, 151.17, 148.39, 140.40, 136.27, 135.74, 132.89, 129.02, 128.85, 128.49, 127.14, 126.91, 126.79, 124.95, 123.88, 122.55, 121.34, 119.82, 117.98, 116.79, 116.74, 99.44, 61.24, 14.07 ppm. FT-IR (KBr): 3061, 2982, 1712, 1635, 1606, 1478, 1377, 1209, 1121, 1038, 927, 757  $\text{cm}^{-1}$ . HRMS (ESI):  $m/z$  calcd for  $\text{C}_{26}\text{H}_{19}\text{O}_4\text{ClNa}$   $[\text{M}+\text{Na}]^+$ : 453.0864; found: 453.0840.

**Ethyl 3'-chloro-6'-*p*-tolyl-2,2'-spirobi[chromene]-3-carboxylate (3n):**

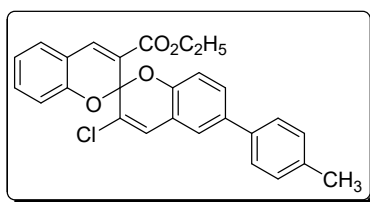

Yield: 74%, Colourless solid. m.p.: 180-182  $^{\circ}\text{C}$ .  $^1\text{H}$  NMR (500 MHz,  $\text{CDCl}_3$ ):  $\delta$  7.94 (s, 1H), 7.44 (d,  $J = 8.1$  Hz, 2H), 7.42-7.39 (m, 1H), 7.38-7.33 (m, 3H), 7.25 (d,  $J = 3.5$  Hz, 2H), 7.07 (td,  $J = 7.5, 1.0$  Hz, 1H), 7.01 (s, 1H), 6.91 (dd,  $J = 12.4, 8.3$  Hz, 2H), 4.34-4.21 (m, 2H), 2.39 (s, 3H), 1.28 (t,  $J = 7.1$  Hz, 3H) ppm.  $^{13}\text{C}$  NMR (100 MHz,  $\text{CDCl}_3$ ):  $\delta$  163.78, 151.13, 148.12, 137.47, 136.84, 136.20, 135.63, 132.81, 129.50, 128.94, 128.24, 126.68, 124.67, 123.87, 122.46, 121.30, 119.72, 117.93, 116.74, 116.62, 99.37, 61.17, 21.07, 14.01 ppm. FT-



IR (KBr): 3055, 2981, 2920, 1713, 1639, 1608, 1483, 1377, 1234, 1213, 1126, 1003, 926, 760  $\text{cm}^{-1}$ . HRMS (ESI):  $m/z$  calcd for  $\text{C}_{27}\text{H}_{21}\text{O}_4\text{ClNa}$   $[\text{M}+\text{Na}]^+$ : 467.1021; found: 467.1011.

**Ethyl 3'-chloro-6'-(4-chlorophenyl)-2,2'-spirobi[chromene]-3-carboxylate (3o):**

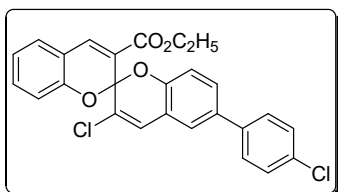

Yield: 72%, Colourless solid. m.p.: 194-196  $^{\circ}\text{C}$ .  $^1\text{H}$  NMR (500 MHz,  $\text{CDCl}_3$ ):  $\delta$  7.94 (s, 1H), 7.49-7.44 (m, 2H), 7.41-7.36 (m, 5H), 7.34 (d,  $J = 2.0$  Hz, 1H), 7.08 (td,  $J = 7.5, 0.7$  Hz, 1H), 7.01 (s, 1H), 6.91 (dd,  $J = 8.2, 3.3$  Hz, 2H), 4.34-4.21 (m, 2H), 1.29 (t,  $J = 7.1$  Hz, 3H) ppm.  $^{13}\text{C}$  NMR (100 MHz,  $\text{CDCl}_3$ ):  $\delta$  163.77, 151.11, 148.58, 138.84, 136.29, 134.47, 133.21, 132.90, 128.98, 128.28, 128.12, 127.03, 124.75, 123.68, 122.58, 121.24, 119.93, 117.94, 116.88, 116.75, 99.41, 61.24, 14.07 ppm. FT-IR (KBr): 3054, 2983, 1709, 1638, 1608, 1478, 1376, 1233, 1213, 1127, 1002, 925, 751  $\text{cm}^{-1}$ . HRMS (ESI):  $m/z$  calcd for  $\text{C}_{26}\text{H}_{18}\text{O}_4\text{Cl}_2\text{Na}$   $[\text{M}+\text{Na}]^+$ : 487.0474; found: 487.0455.

**Ethyl 3'-chloro-6-methyl-2,2'-spirobi[chromene]-3-carboxylate (3p):**

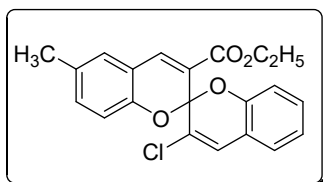

Yield: 62%, Colourless solid. m.p.: 130-132  $^{\circ}\text{C}$ .  $^1\text{H}$  NMR (500 MHz,  $\text{CDCl}_3$ ):  $\delta$  7.88 (s, 1H), 7.21-7.13 (m, 4H), 7.02 (dd,  $J = 7.5, 1.0$  Hz, 1H), 6.94 (s, 1H), 6.81 (dd,  $J = 17.3, 8.0$  Hz, 2H), 4.31-4.19 (m, 2H), 2.33 (s, 3H), 1.27 (t,  $J = 7.1$  Hz, 3H) ppm.  $^{13}\text{C}$  NMR (100 MHz,  $\text{CDCl}_3$ ):  $\delta$  163.93, 149.09, 148.90, 136.38, 133.59, 131.87, 129.61, 129.03, 126.46, 126.34, 123.77, 122.31, 121.31, 119.63, 117.74, 116.50, 116.40, 99.28, 61.14, 20.56, 14.02 ppm. FT-IR (KBr): 3081, 2976, 1710, 1637, 1483, 1377, 1243, 1215, 1036, 932, 764  $\text{cm}^{-1}$ . HRMS (ESI):  $m/z$  calcd for  $\text{C}_{21}\text{H}_{18}\text{O}_4\text{Cl}$   $[\text{M}+\text{H}]^+$ : 369.0888; found: 369.0857.

**Ethyl 3',6-dichloro-2,2'-spirobi[chromene]-3-carboxylate (3s):**

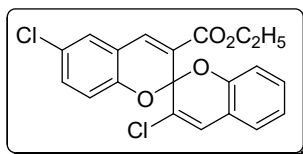

Yield: 64%, Colourless solid. m.p.: 126-128 °C. <sup>1</sup>H NMR (400 MHz, CDCl<sub>3</sub>): δ 7.84 (s, 1H), 7.35 (s, 1H), 7.29 (d, *J* = 8.6 Hz, 1H), 7.23-7.15 (m, 2H), 7.03 (s, 1H), 6.96 (s, 1H), 6.84 (d, *J* = 8.3 Hz, 2H), 4.33-4.20 (m, 2H), 1.27 (t, *J* = 6.9 Hz, 3H) ppm. <sup>13</sup>C NMR (125 MHz, CDCl<sub>3</sub>): δ 163.42, 149.53, 148.62, 134.84, 132.34, 129.75, 128.06, 127.32, 126.38, 125.82, 124.01, 122.52, 119.41, 119.20, 118.17, 116.30, 99.33, 61.34, 13.94 ppm. FT-IR (KBr): 3083, 2930, 1718, 1635, 1641, 1479, 1374, 1224, 1205, 1039, 921, 761 cm<sup>-1</sup>. HRMS (ESI): *m/z* calcd for C<sub>20</sub>H<sub>14</sub>O<sub>4</sub>Cl<sub>2</sub>Na [M+Na]<sup>+</sup>: 411.0161; found: 411.0132.

**Ethyl 6-bromo-3'-chloro-2,2'-spirobi[chromene]-3-carboxylate (3t):**

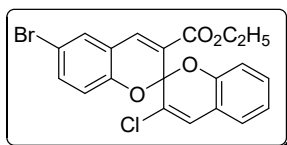

Yield: 68%, Colourless solid. m.p.: 120-122 °C. <sup>1</sup>H NMR (500 MHz, CDCl<sub>3</sub>): δ 7.83 (s, 1H), 7.50 (d, *J* = 2.2 Hz, 1H), 7.43 (dd, *J* = 8.7, 2.3 Hz, 1H), 7.23-7.16 (m, 2H), 7.03 (t, *J* = 7.3 Hz, 1H), 6.96 (s, 1H), 6.84 (d, *J* = 8.1 Hz, 1H), 6.79 (d, *J* = 8.7 Hz, 1H), 4.33-4.20 (m, 2H), 1.27 (t, *J* = 7.1 Hz, 3H) ppm. <sup>13</sup>C NMR (101 MHz, CDCl<sub>3</sub>): δ 163.45, 150.10, 148.66, 135.26, 134.77, 131.07, 129.81, 126.43, 125.85, 124.07, 122.58, 119.80, 119.45, 118.62, 116.35, 114.52, 99.35, 61.40, 13.99 ppm. FT-IR (KBr): 3080, 2978, 1720, 1640, 1479, 1373, 1223, 1204, 1107, 1039, 004, 923, 761 cm<sup>-1</sup>. HRMS (ESI): *m/z* calcd for C<sub>20</sub>H<sub>14</sub>O<sub>4</sub>ClBrNa [M+Na]<sup>+</sup>: 454.9656; found: 454.9630.

**Ethyl 3'-chloro-6-phenyl-2,2'-spirobi[chromene]-3-carboxylate (3u):**

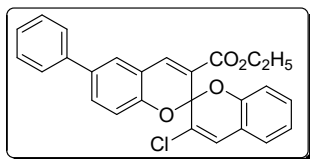

Yield: 70%, Colourless solid. m.p.: 132-134 °C. <sup>1</sup>H NMR (500 MHz, CDCl<sub>3</sub>): δ 8.00 (s, 1H), 7.60-7.52 (m, 4H), 7.44 (t, *J* = 7.5 Hz, 2H), 7.36 (d, *J* = 7.3 Hz, 1H), 7.20 (dd, *J* = 16.0, 7.7 Hz, 2H), 7.03 (t, *J* = 7.4 Hz, 1H), 6.97 (t, *J* = 4.2 Hz, 2H), 6.87 (d, *J* = 8.0 Hz, 1H), 4.34-4.21 (m, 2H), 1.28 (t, *J* = 7.1 Hz, 3H) ppm. <sup>13</sup>C NMR (126 MHz, CDCl<sub>3</sub>): δ 163.79, 150.65, 148.83, 139.98, 136.25, 135.85, 131.62, 129.72, 128.92, 127.36, 126.86, 126.40, 126.27, 123.89, 122.44, 121.74, 119.58, 118.20, 117.12, 116.42, 99.40, 61.25, 14.03 ppm. FT-IR (KBr): 3032, 2985, 1710, 1638, 1481, 1254, 1223, 1036, 923, 695 cm<sup>-1</sup>. HRMS (ESI): *m/z* calcd for C<sub>26</sub>H<sub>19</sub>O<sub>4</sub>ClNa [M+Na]<sup>+</sup>: 453.0864; found: 453.0858.

3. Copies of  $^1\text{H}$ -NMR,  $^{13}\text{C}$ -NMR and HRMS Spectrums of compounds **3a-i**, **3k**, **3m-p**, **3s-u**:

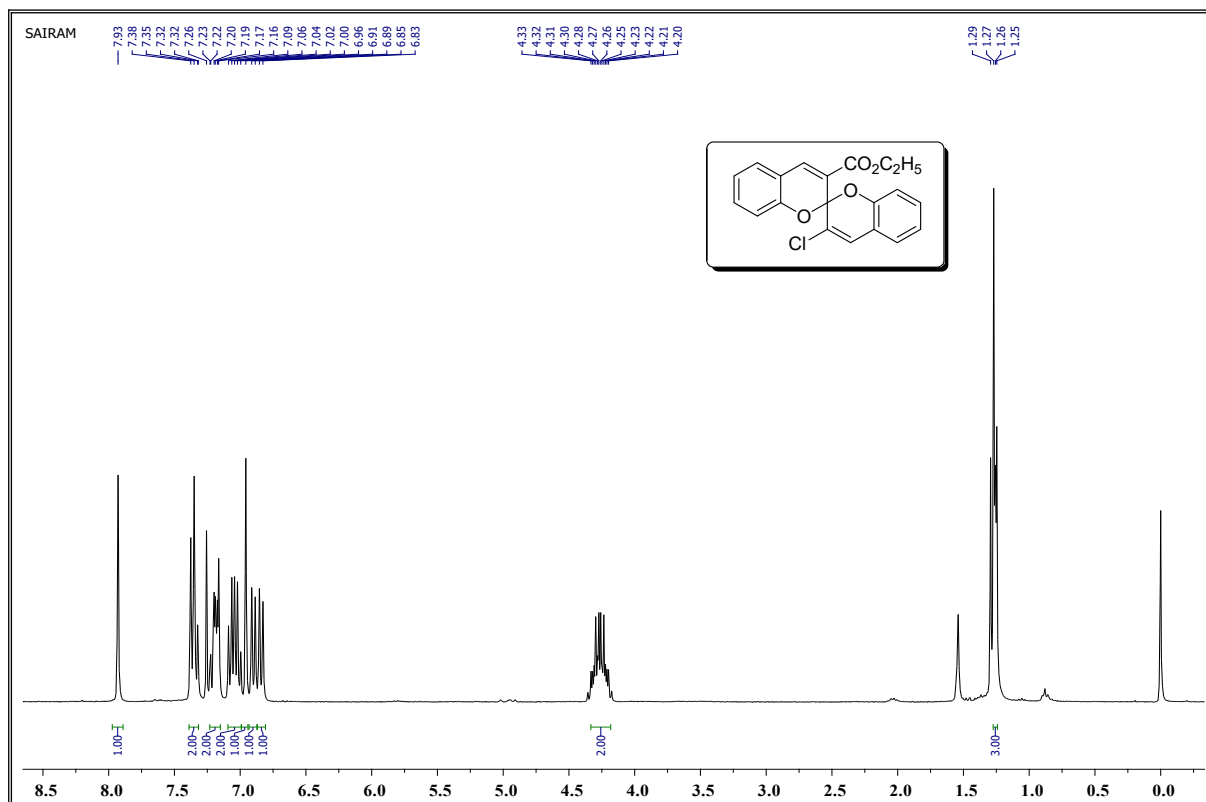

$^1\text{H}$  NMR spectrum of compound **3a**

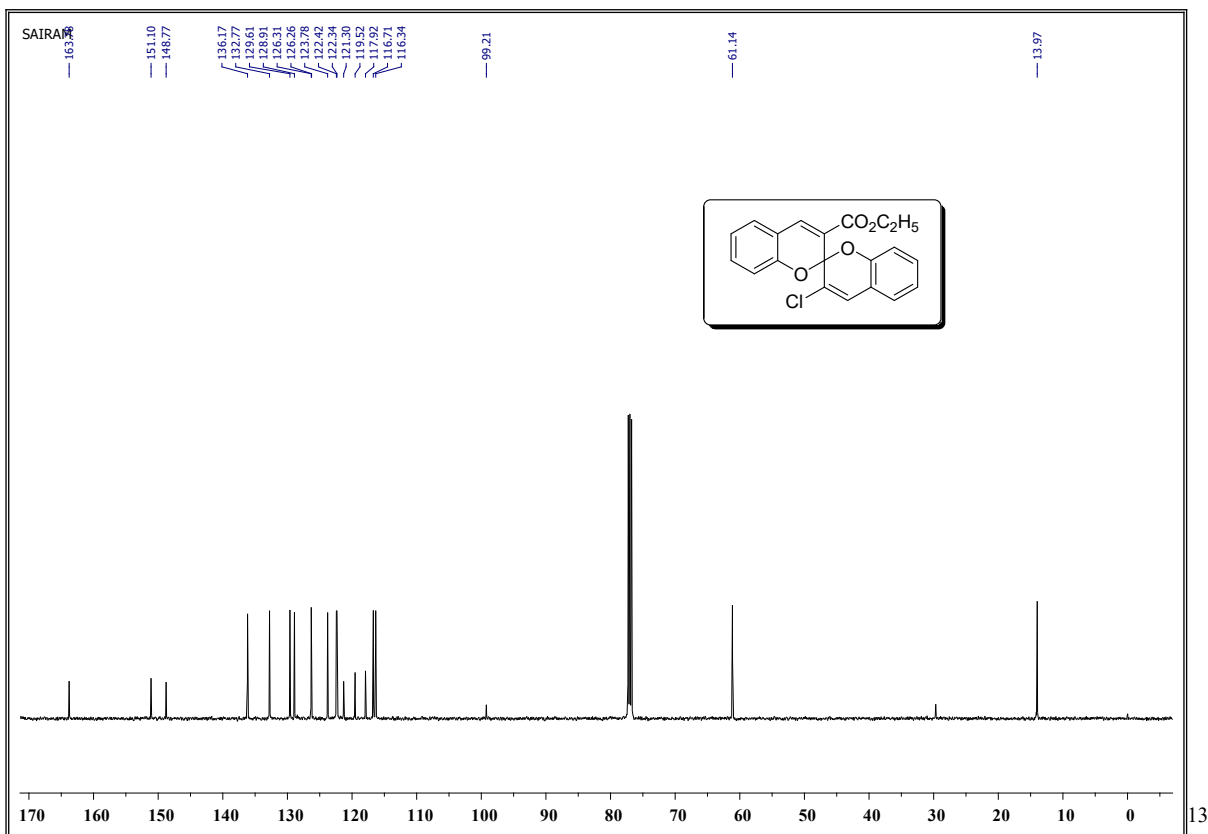

C NMR spectrum of compound **3a**

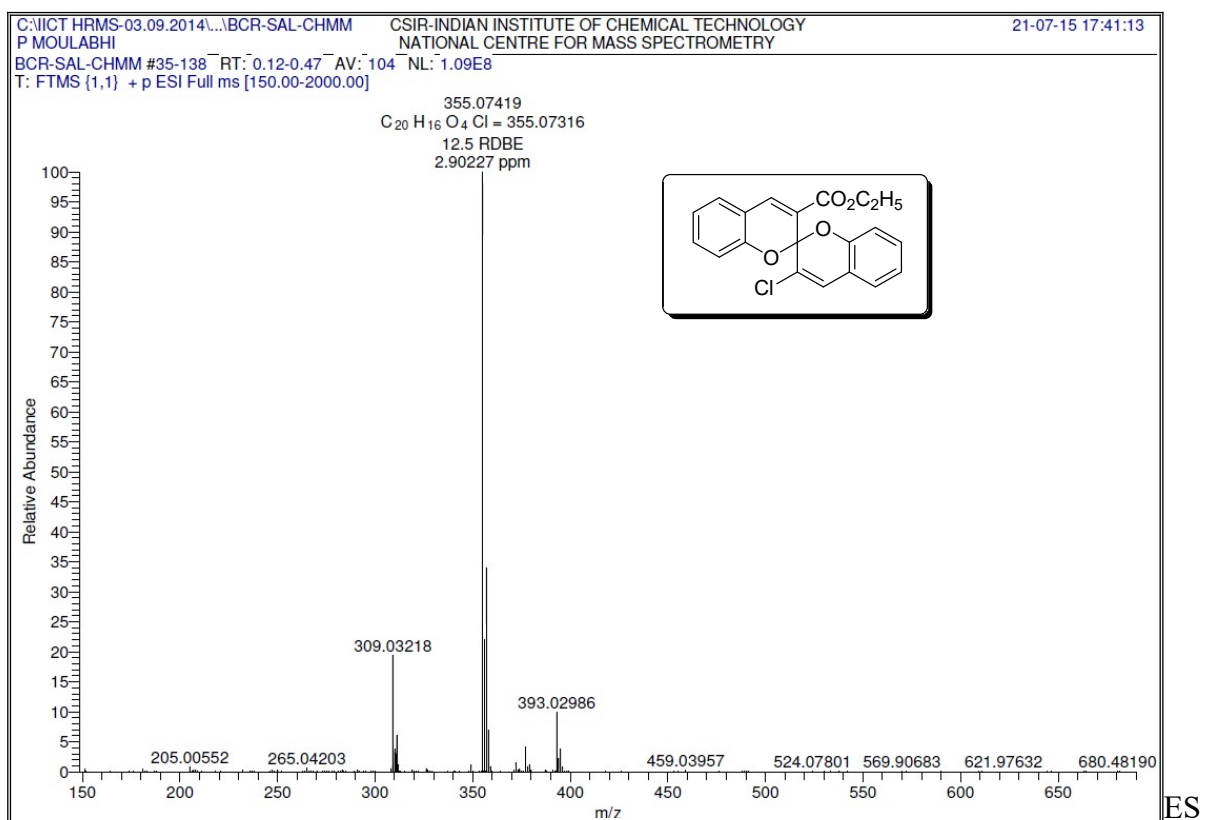

I-HRMS of compound **3a**

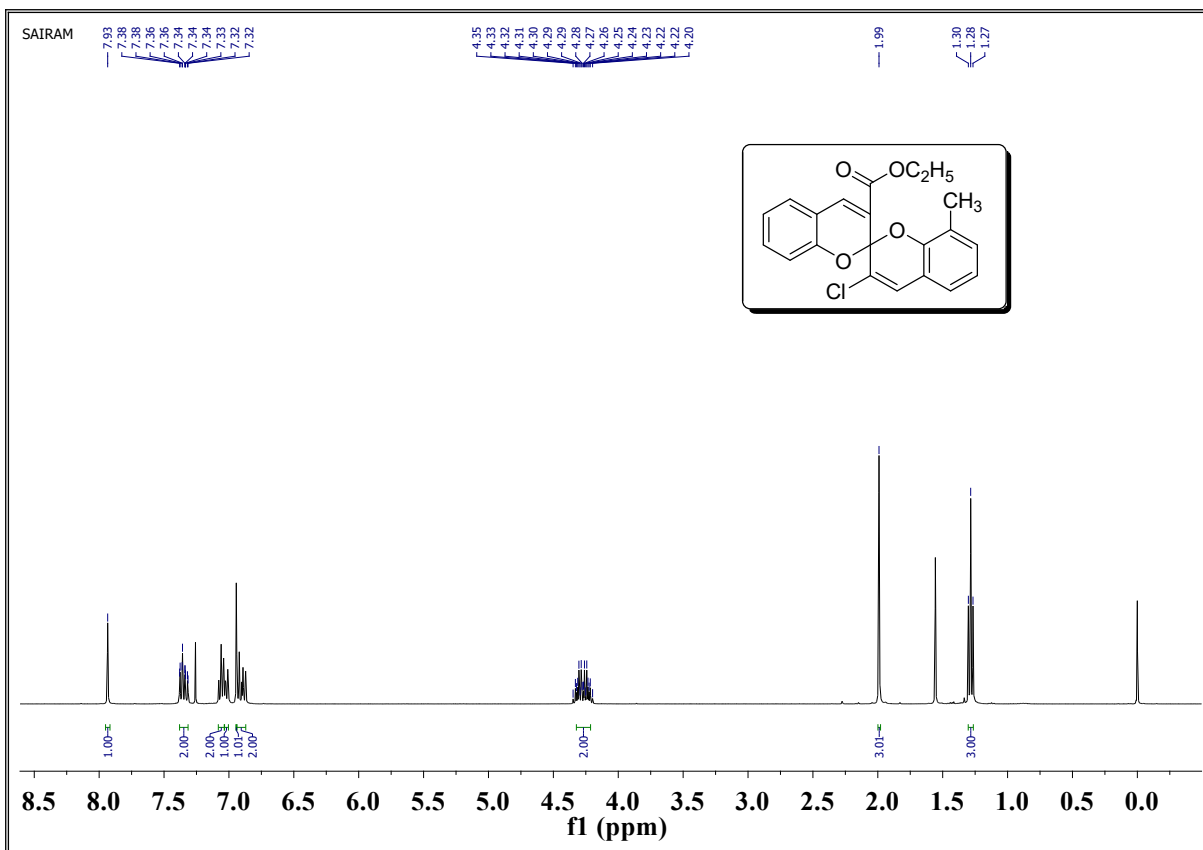

<sup>1</sup>H NMR spectrum of compound **3b**

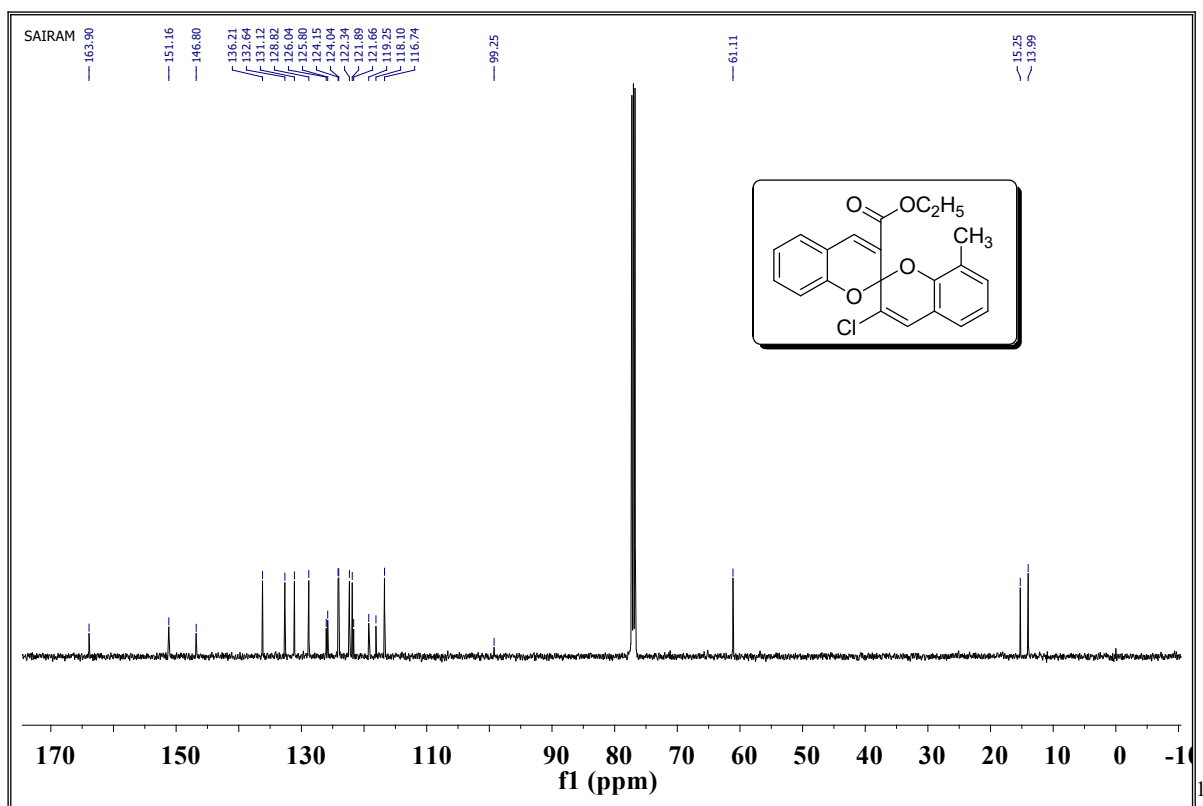

<sup>13</sup>C NMR spectrum of compound **3b**

MS Formula Results: + Scan (0.084-0.193 min) Sub - BCR-3-ME-SPKET-368.d (BCR-3-ME-SPKET-368.d)

| m/z      | Ion                                              | Formula                                          | Abundance |       |             |          |           |            |                |             |               |            |          |     |
|----------|--------------------------------------------------|--------------------------------------------------|-----------|-------|-------------|----------|-----------|------------|----------------|-------------|---------------|------------|----------|-----|
| 369.0879 | (M+H) <sup>+</sup>                               | C <sub>21</sub> H <sub>18</sub> ClO <sub>4</sub> | 23832.1   |       |             |          |           |            |                |             |               |            |          |     |
| Best     | Formula (M)                                      | Ion Formula                                      | Calc m/z  | Score | Cross Score | Mass     | Calc Mass | Diff (ppm) | Abs Diff (ppm) | Abund Match | Spacing Match | Mass Match | m/z      | DBE |
| ✓        | C <sub>21</sub> H <sub>17</sub> ClO <sub>4</sub> | C <sub>21</sub> H <sub>18</sub> ClO <sub>4</sub> | 369.0888  | 97.47 |             | 368.0807 | 368.0815  | 2.29       | 2.29           | 99.72       | 98.14         | 95.79      | 369.0879 | 13  |

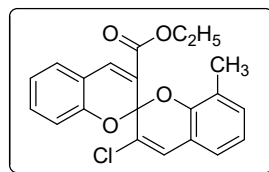

Sample Name: BCR-3-ME-SPKET-368 Position: Vial 33 Instrument Name: Instrument 1 User Name:  
 Inj Vol: -1 InjPosition: Sample IRM Calibration Status: Success  
 Data Filename: BCR-3-ME-SPKET-368.d ACQ Method: SCS.m Comment: Acquired Time: 5/11/2016 12:00:40 PM

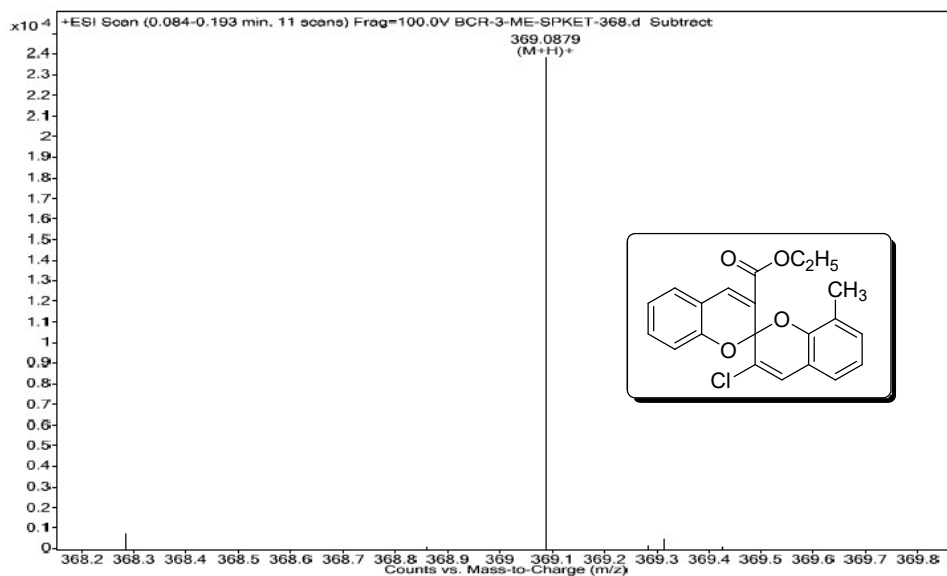

ESI-HRMS of compound **3b**

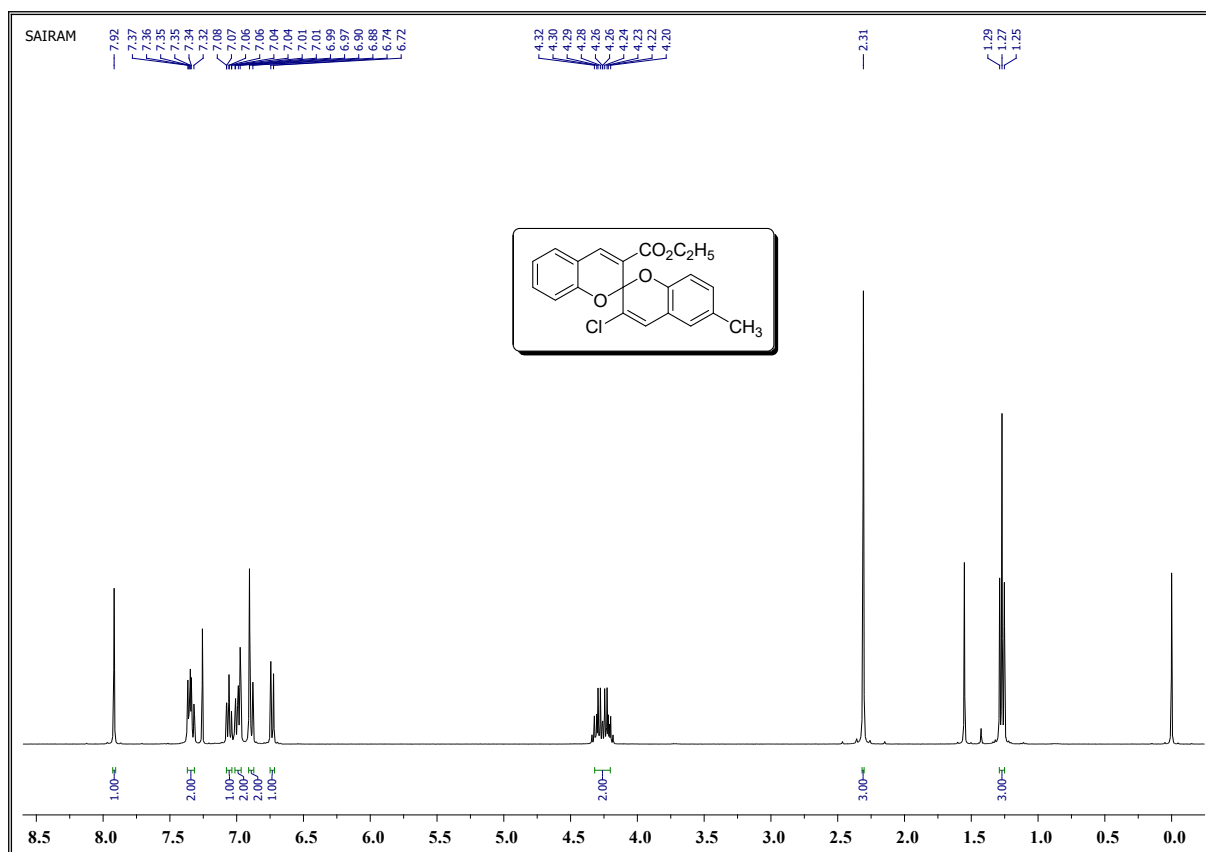

$^1\text{H}$  NMR spectrum of compound **3c**

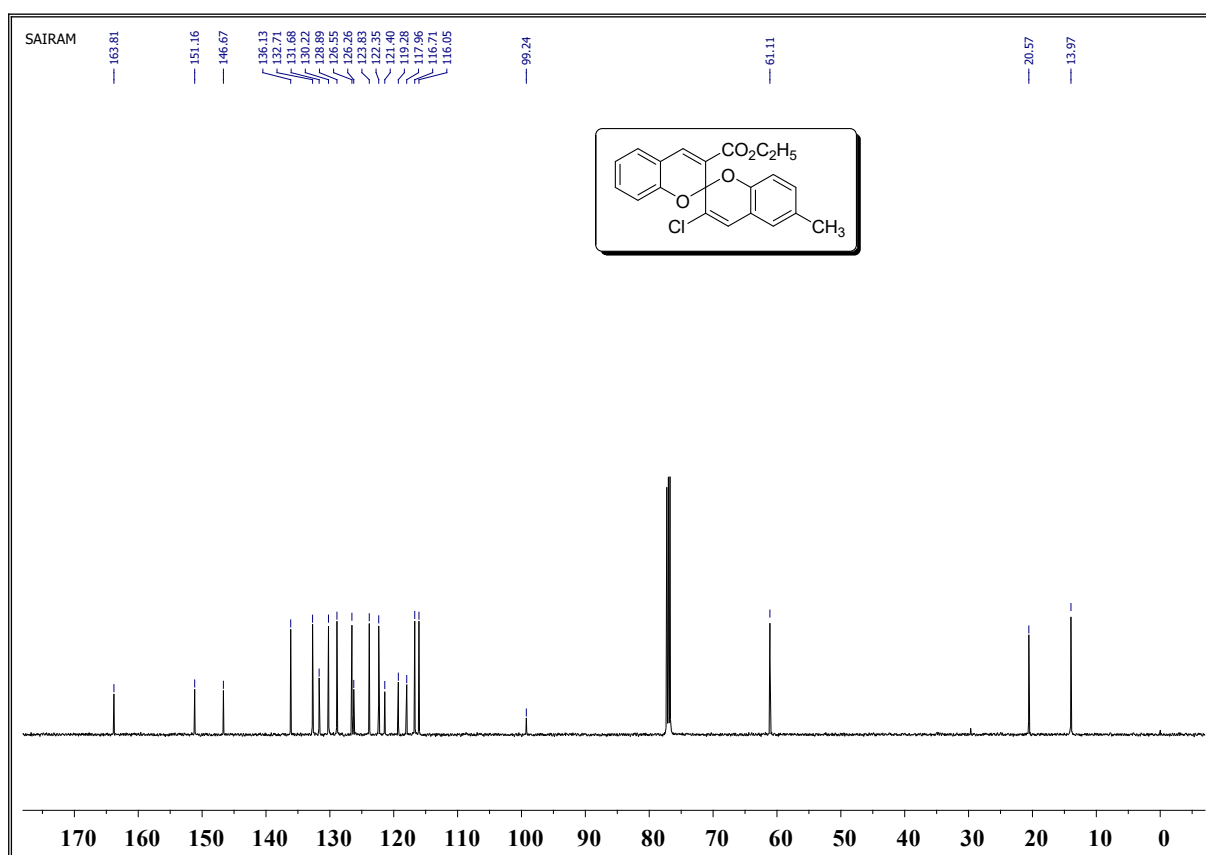

$^{13}\text{C}$  NMR spectrum of compound **3c**



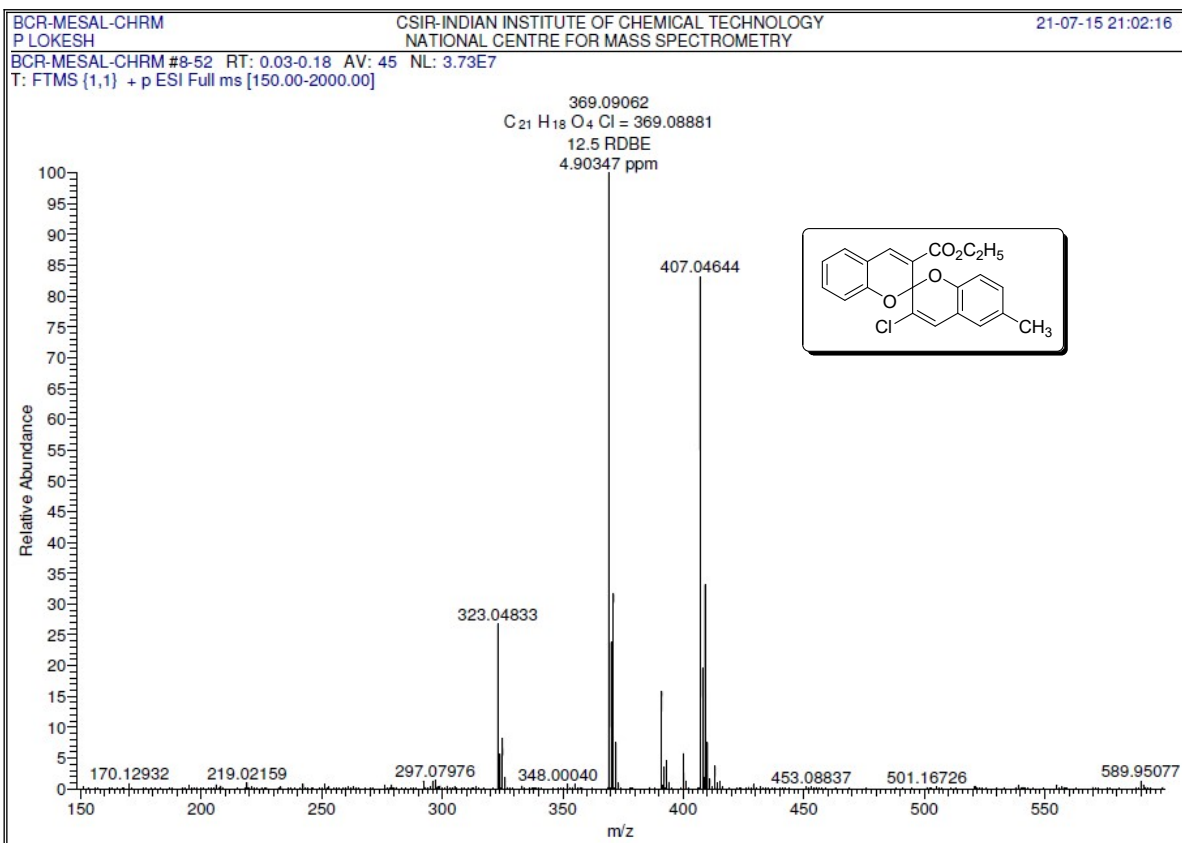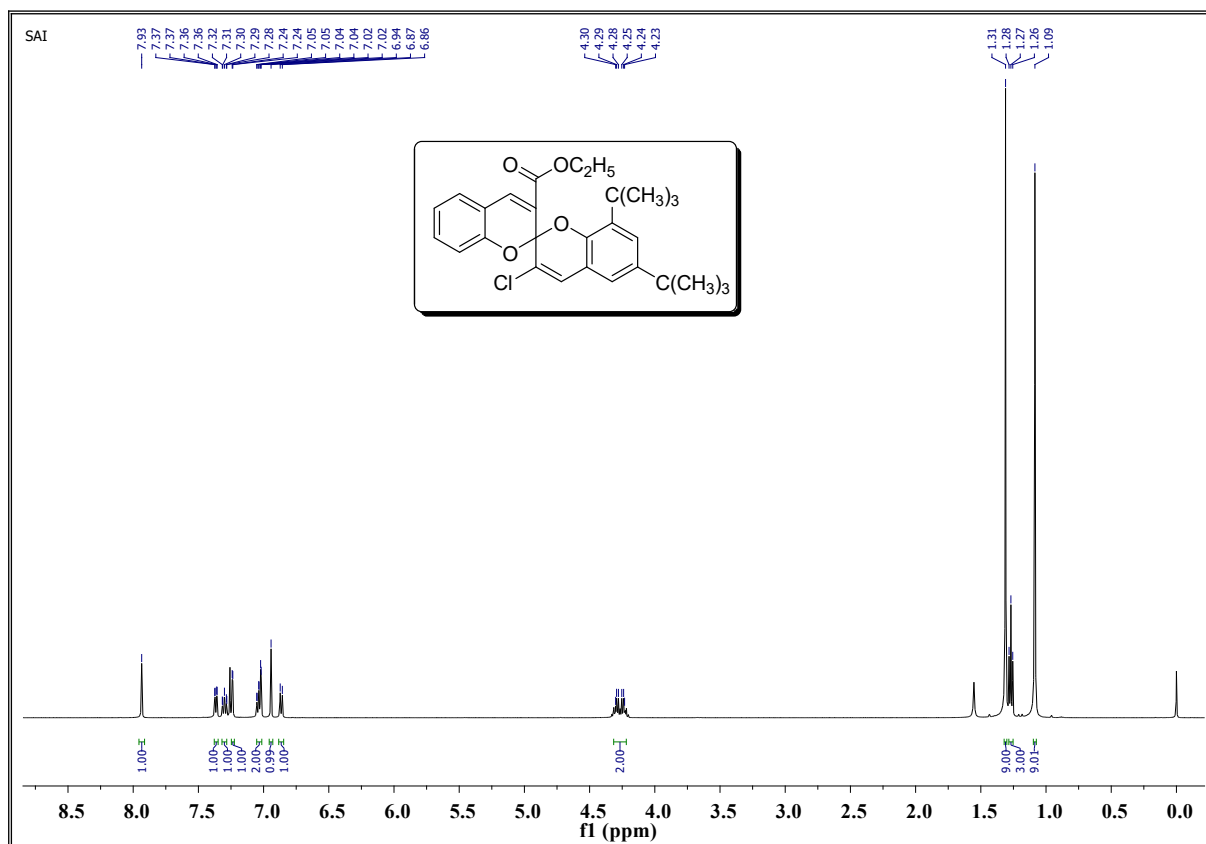

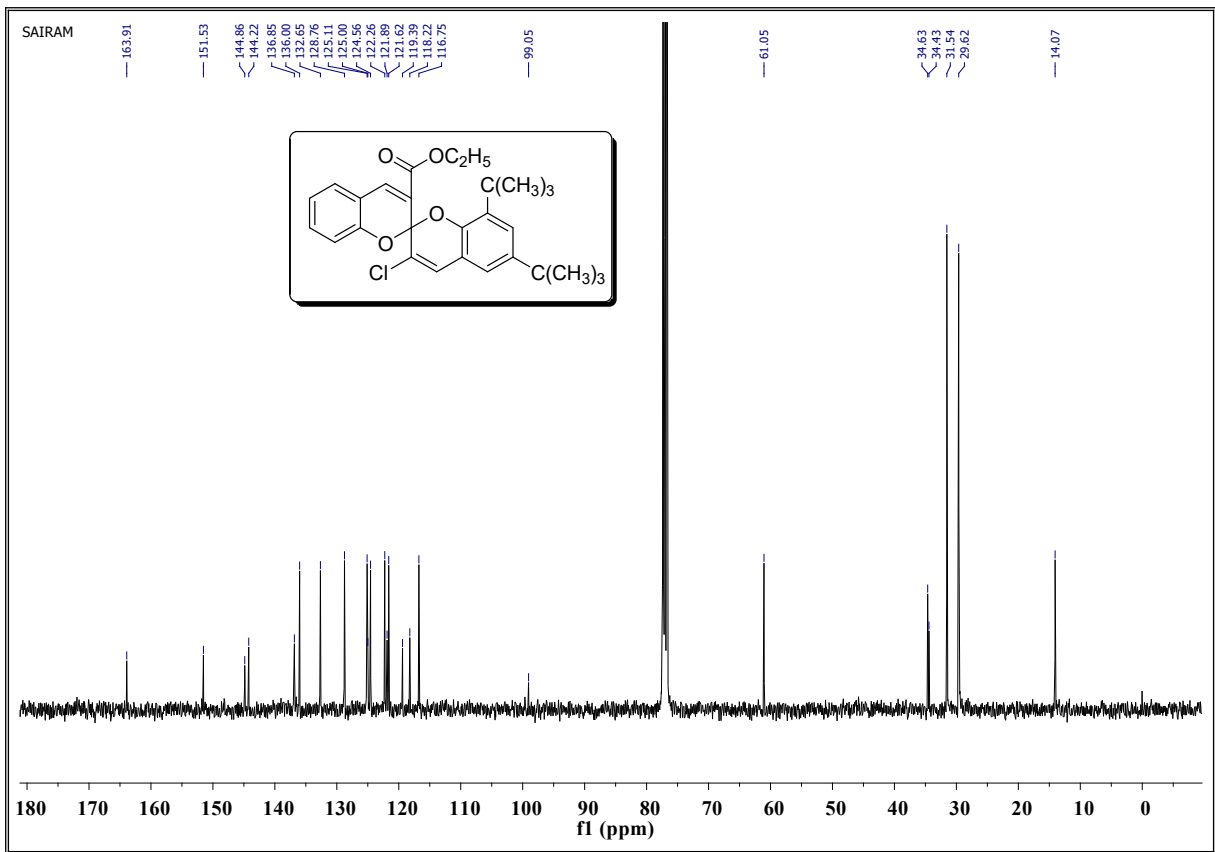

<sup>13</sup>C NMR spectrum of compound **3d**

MS Formula Results: + Scan (0.095-0.248 min) Sub - BCR-DI-T-SP-KET.d (BCR-DI-T-SP-KET.d)

| m/z      | Ion                 | Formula                                            | Abundance |
|----------|---------------------|----------------------------------------------------|-----------|
| 489.1793 | (M+Na) <sup>+</sup> | C <sub>28</sub> H <sub>31</sub> ClNaO <sub>4</sub> | 435238.6  |

  

| Best                                | Formula (M)                                      | Ion Formula                                        | Calc m/z | Score | † | Cross Score | Mass   | Calc Mass | Diff (ppm) | Abs Diff (ppm) | Abund Match | Spacing Match | Mass Match | m/z      | DBE |
|-------------------------------------|--------------------------------------------------|----------------------------------------------------|----------|-------|---|-------------|--------|-----------|------------|----------------|-------------|---------------|------------|----------|-----|
| <input checked="" type="checkbox"/> | C <sub>28</sub> H <sub>31</sub> ClO <sub>4</sub> | C <sub>28</sub> H <sub>31</sub> ClNaO <sub>4</sub> | 489.1803 | 95.97 |   |             | 466.19 | 466.1911  | 2.33       | 2.33           | 96.02       | 98.08         | 94.89      | 489.1793 | 13  |

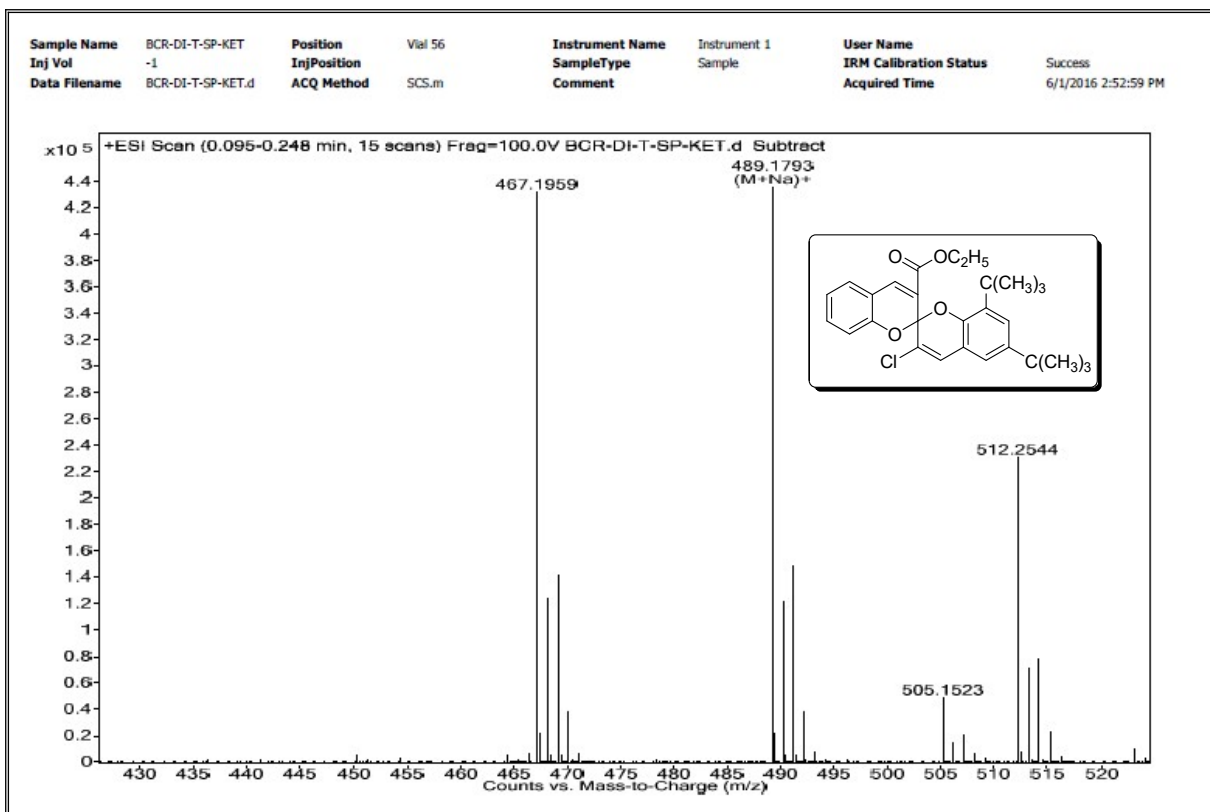

ESI-HRMS of compound 3d

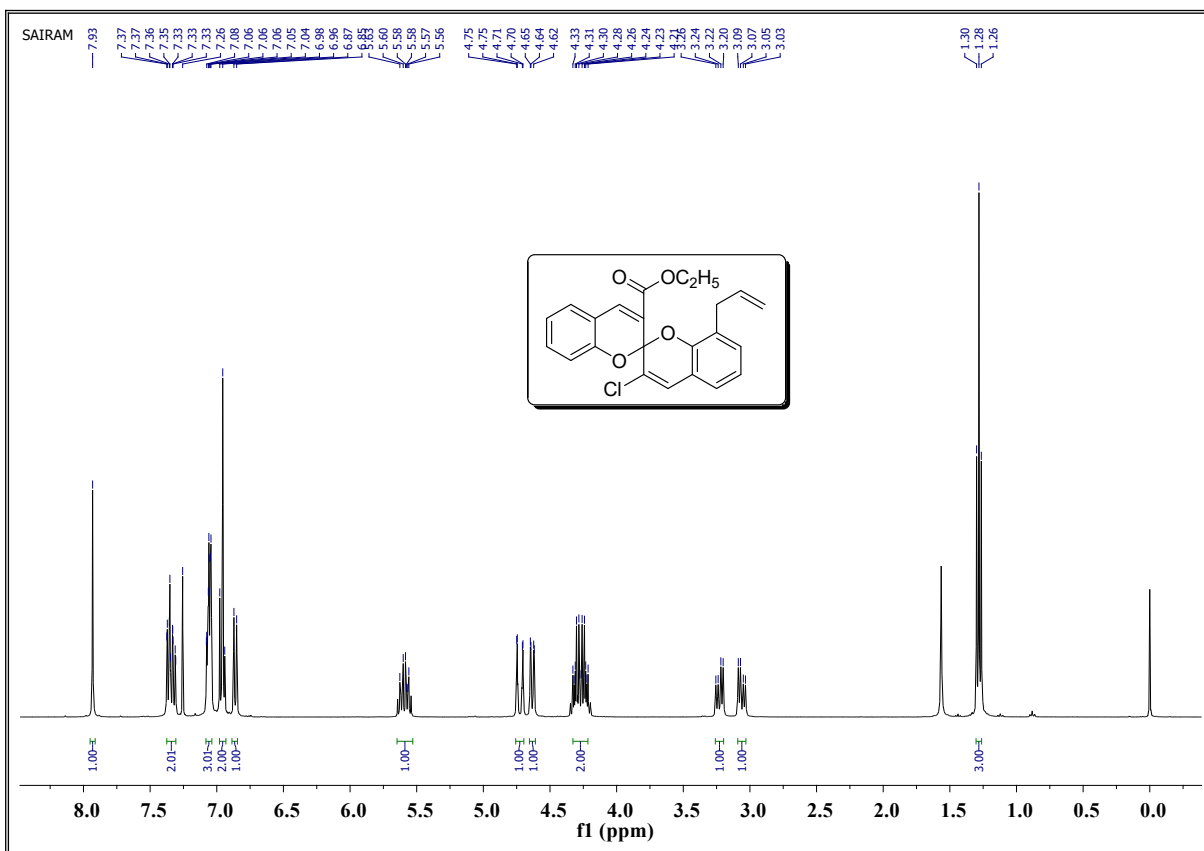

<sup>1</sup>H NMR spectrum of compound 3e

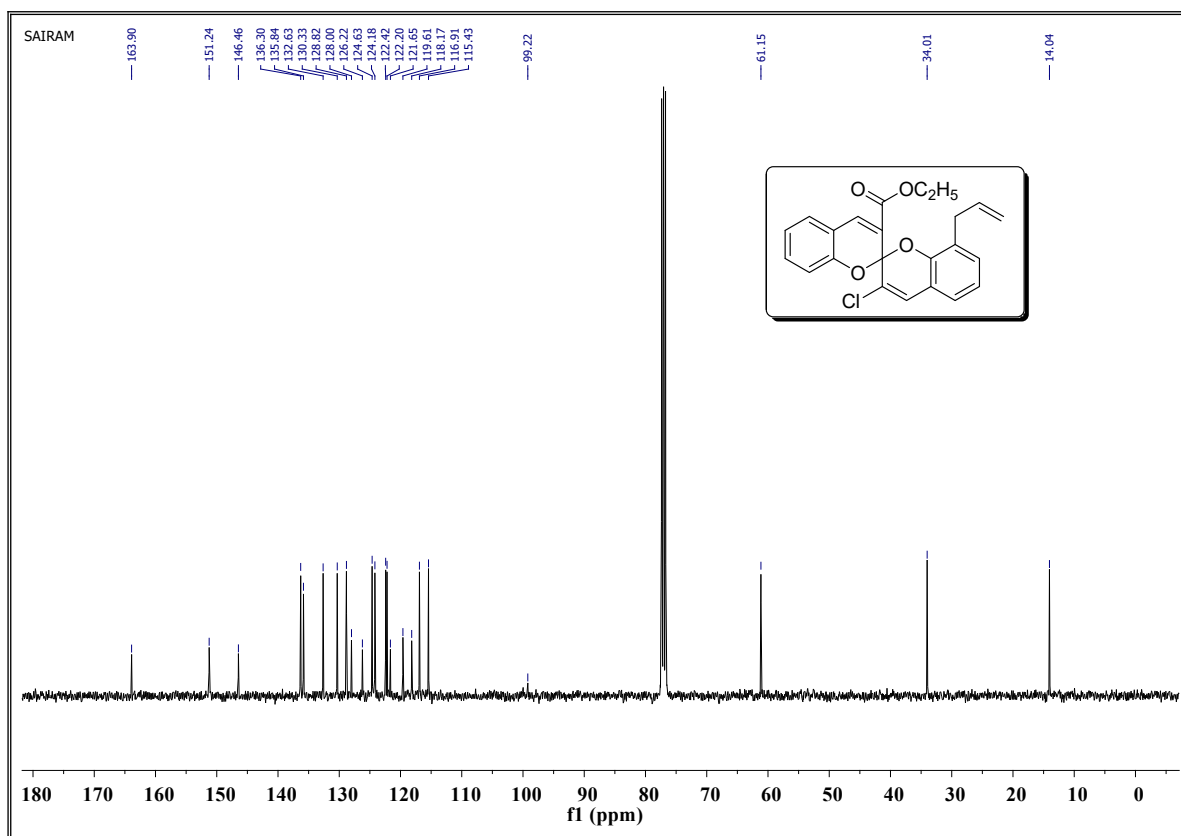

$^{13}\text{C}$  NMR spectrum of compound **3e**

MS Formula Results: + Scan (0.100-0.210 min) Sub - BCR-3-ALLYL-394.d (BCR-3-ALLYL-394.d)

| m/z      | Ion                 | Formula                                            | Abundance |
|----------|---------------------|----------------------------------------------------|-----------|
| 417.0848 | (M+Na) <sup>+</sup> | C <sub>23</sub> H <sub>19</sub> ClNaO <sub>4</sub> | 327875    |

  

| Best                                | Formula (M)                                      | Ion Formula                                        | Calc m/z | Score | Cross Score | Mass     | Calc Mass | Diff (ppm) | Abs Diff (ppm) | Abund Match | Spacing Match | Mass Match | m/z      | DBE |
|-------------------------------------|--------------------------------------------------|----------------------------------------------------|----------|-------|-------------|----------|-----------|------------|----------------|-------------|---------------|------------|----------|-----|
| <input checked="" type="checkbox"/> | C <sub>23</sub> H <sub>19</sub> ClO <sub>4</sub> | C <sub>23</sub> H <sub>19</sub> ClNaO <sub>4</sub> | 417.0864 | 92.56 |             | 394.0956 | 394.0972  | 4.02       | 4.02           | 95.91       | 98.67         | 87.49      | 417.0848 | 14  |

  

Chemical structure of compound **3e** is shown in a box within the table area.

|               |                   |             |         |                 |              |                        |                     |
|---------------|-------------------|-------------|---------|-----------------|--------------|------------------------|---------------------|
| Sample Name   | BCR-3-ALLYL-394   | Position    | Vial 57 | Instrument Name | Instrument 1 | User Name              |                     |
| Inj Vol       | -1                | InjPosition |         | SampleType      | Sample       | IRM Calibration Status | Success             |
| Data Filename | BCR-3-ALLYL-394.d | ACQ Method  | SCS.m   | Comment         |              | Acquired Time          | 6/1/2016 2:56:30 PM |

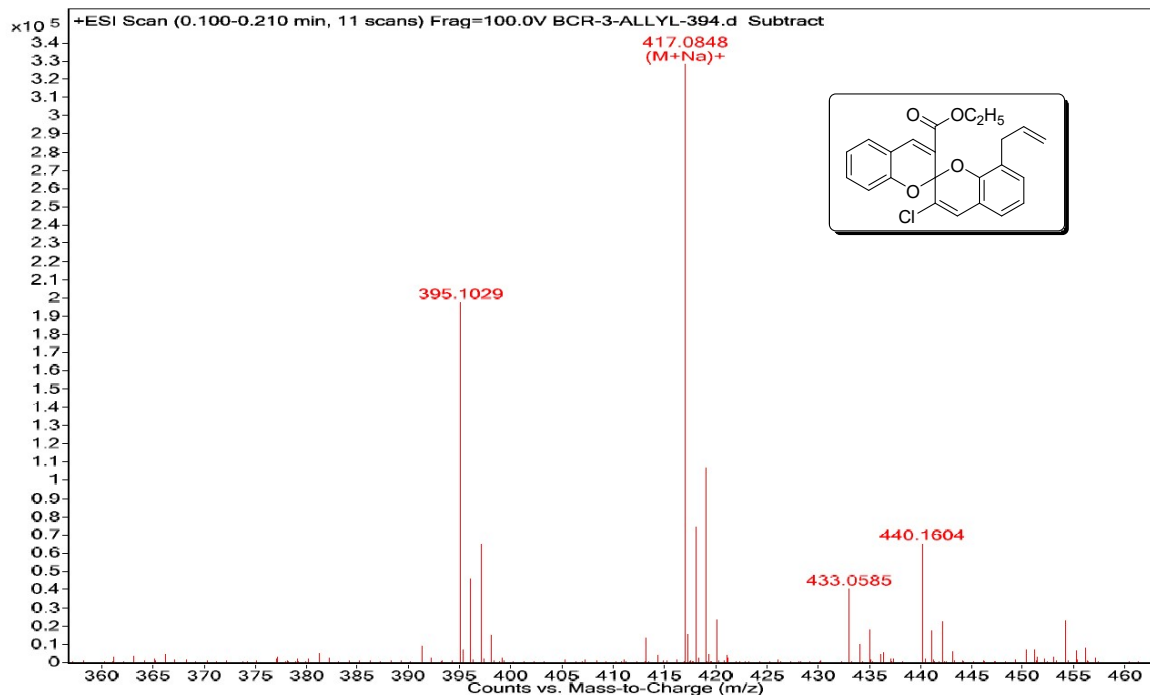

ESI-HRMS of compound 3e

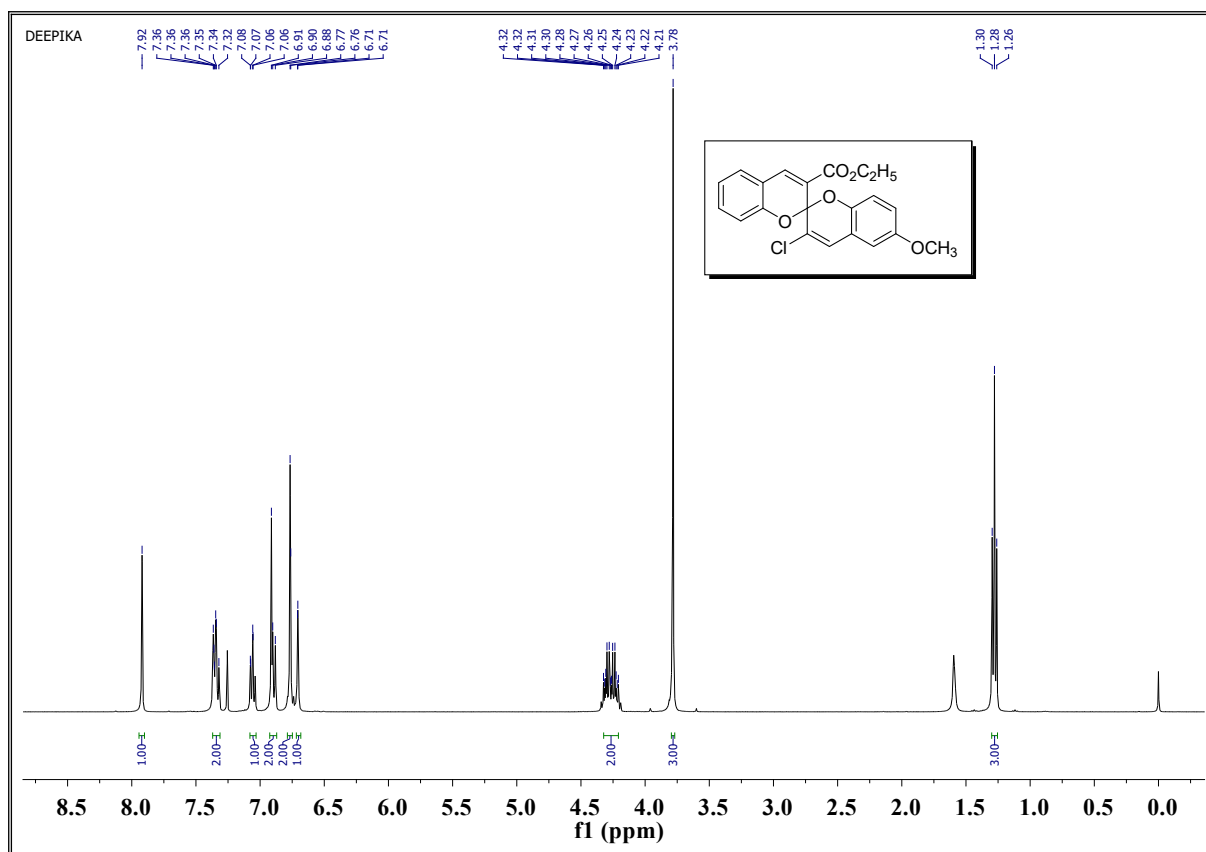

<sup>1</sup>H NMR spectrum of compound **3f**

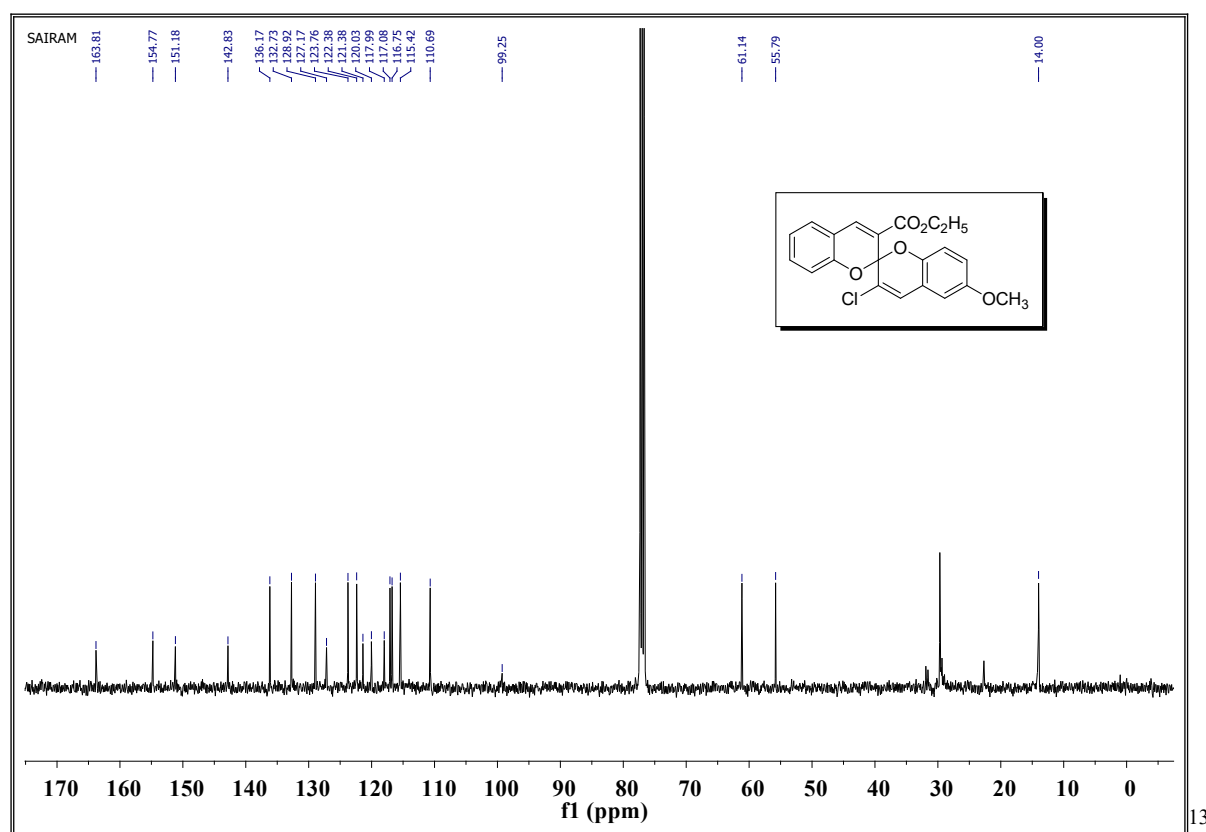

<sup>13</sup>C NMR spectrum of compound **3f**

MS Formula Results: + Scan (0.114-0.147 min) Sub - BCR-5-OME-SP-KET.d (BCR-5-OME-SP-KET.d)

| m/z      | Ion                | Formula                                          | Abundance |
|----------|--------------------|--------------------------------------------------|-----------|
| 385.0813 | (M+H) <sup>+</sup> | C <sub>21</sub> H <sub>18</sub> ClO <sub>5</sub> | 55647.3   |

  

| Best                                | Formula (M)                                      | Ion Formula                                      | Calc m/z | Score | Cross Score | Mass    | Calc Mass | Diff (ppm) | Abs Diff (ppm) | Abund Match | Spacing Match | Mass Match | m/z      | DBE |
|-------------------------------------|--------------------------------------------------|--------------------------------------------------|----------|-------|-------------|---------|-----------|------------|----------------|-------------|---------------|------------|----------|-----|
| <input checked="" type="checkbox"/> | C <sub>21</sub> H <sub>17</sub> ClO <sub>5</sub> | C <sub>21</sub> H <sub>18</sub> ClO <sub>5</sub> | 385.0837 | 85.4  |             | 384.074 | 384.0765  | 6.28       | 6.28           | 96.91       | 99.54         | 71.42      | 385.0813 | 13  |

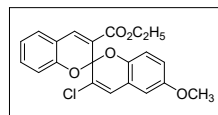

**Sample Name** BCR-5-OME-SP-KET    **Position** Vial 55    **Instrument Name** Instrument 1    **User Name**  
**Inj Vol** -1    **InjPosition**    **SampleType** Sample    **IRM Calibration Status** Success  
**Data Filename** BCR-5-OME-SP-KET.d    **ACQ Method** SCS.m    **Comment**    **Acquired Time** 6/1/2016 2:49:31 PM

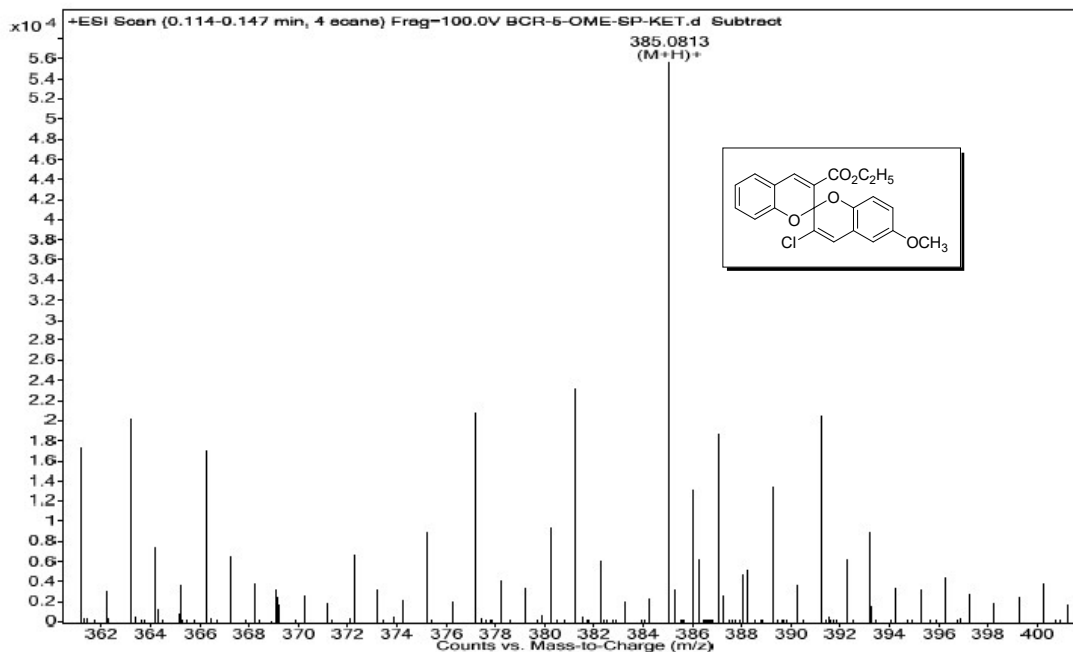

ESI-HRMS of compound **3f**

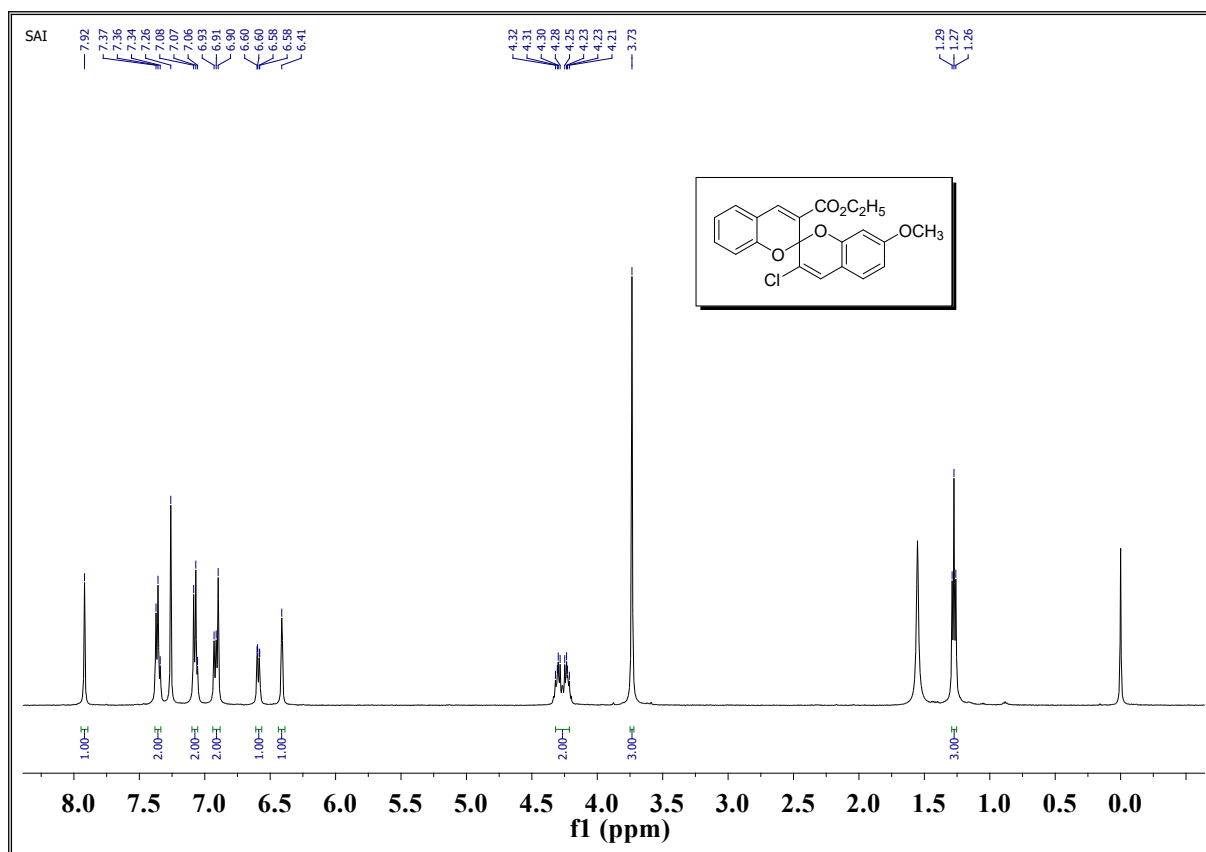

<sup>1</sup>H NMR spectrum of compound **3g**

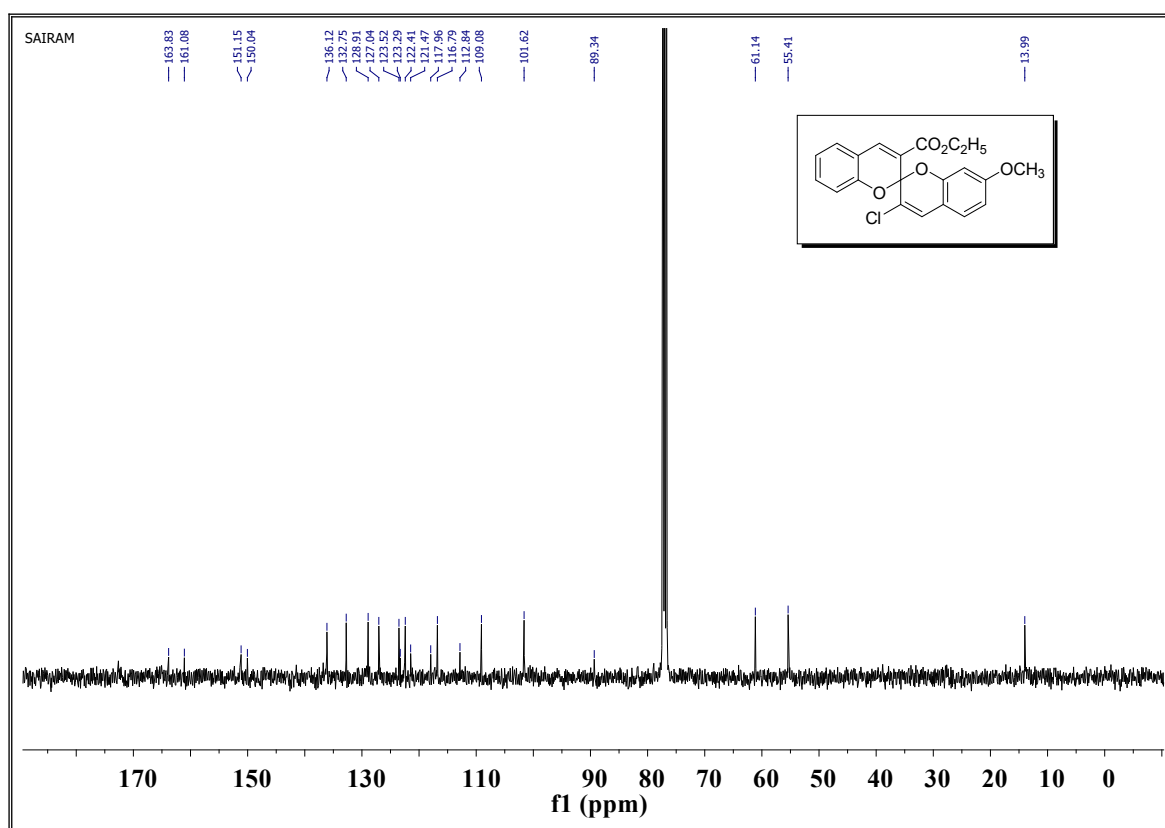

<sup>13</sup>C NMR spectrum of compound **3g**

13



MS Formula Results: + Scan (0.099-0.208 min) Sub - BCR-4-OME-SP-384.d (BCR-4-OME-SP-384.d)

| m/z      | Ion                 | Formula      | Abundance |
|----------|---------------------|--------------|-----------|
| 407.0643 | (M+Na) <sup>+</sup> | C21H17ClNaO5 | 257590.8  |

  

| Best | Formula (M) | Ion Formula  | Calc m/z | Score | Cross Score | Mass     | Calc Mass | Diff (ppm) | Abs Diff (ppm) | Abund Match | Spacing Match | Mass Match | m/z      | DBE |
|------|-------------|--------------|----------|-------|-------------|----------|-----------|------------|----------------|-------------|---------------|------------|----------|-----|
| ✓    | C21H17ClO5  | C21H17ClNaO5 | 407.0657 | 93.89 |             | 384.0751 | 384.0785  | 3.54       | 3.54           | 96.41       | 97.85         | 90.39      | 407.0643 | 13  |

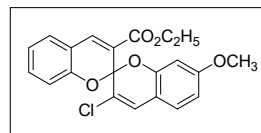

Sample Name: BCR-4-OME-SP-384    Position: Vial 70    Instrument Name: Instrument 1    User Name:   
 Inj Vol: -1    InjPosition:    SampleType: Sample    IRM Calibration Status: Success      
 Data Filename: BCR-4-OME-SP-384.d    ACQ Method: SCS.m    Comment:    Acquired Time: 6/1/2016 3:42:14 PM

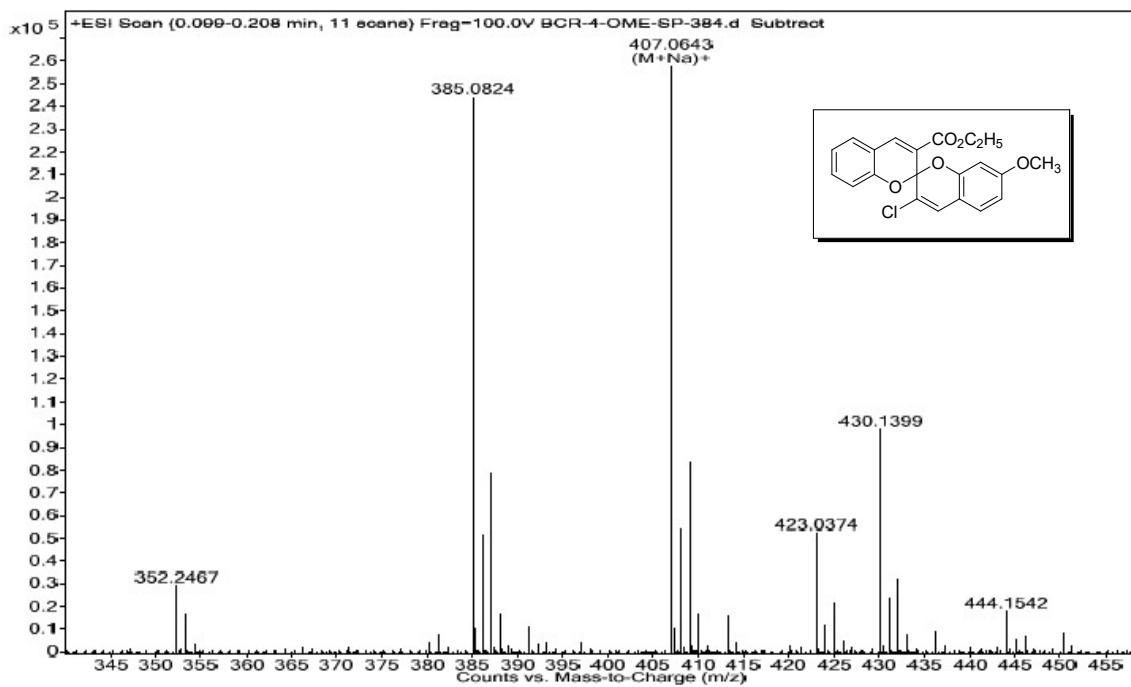

ESI-HRMS of compound **3g**

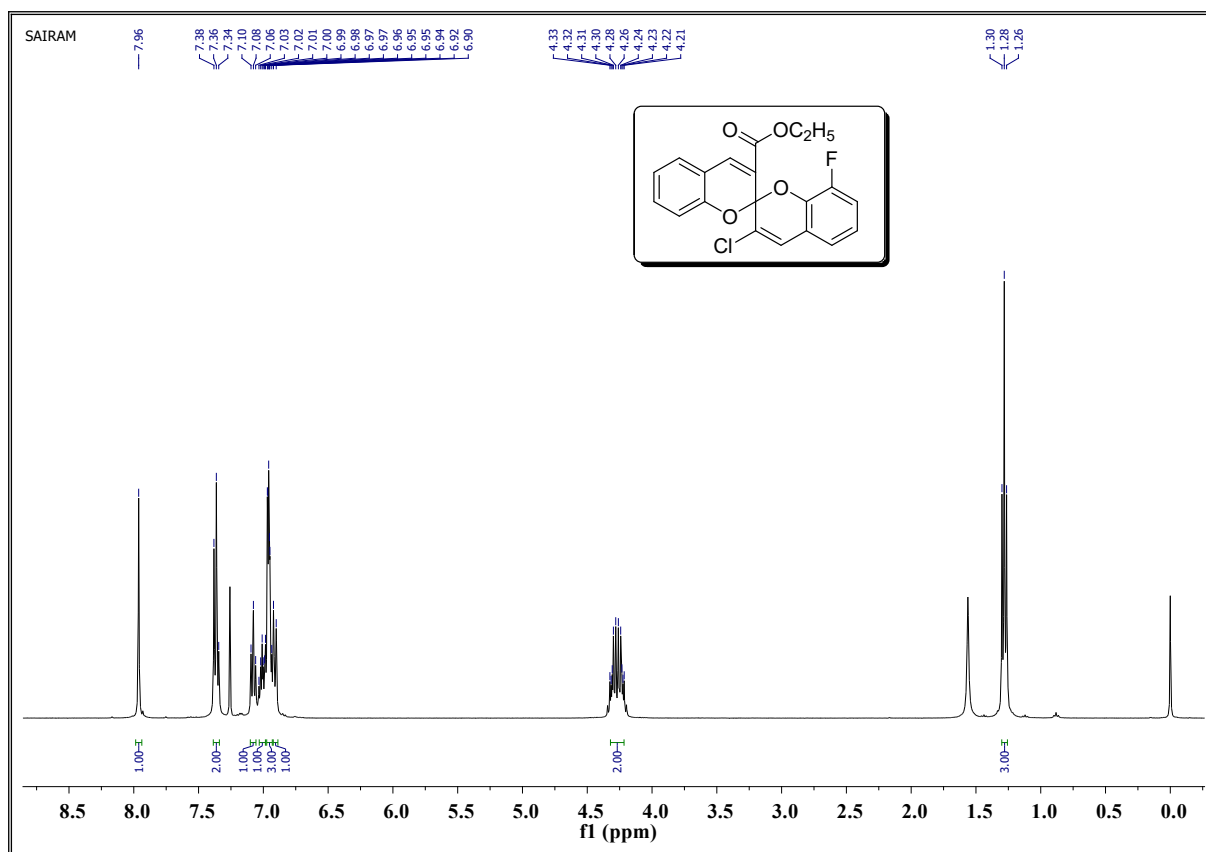

<sup>1</sup>H NMR spectrum of compound **3h**

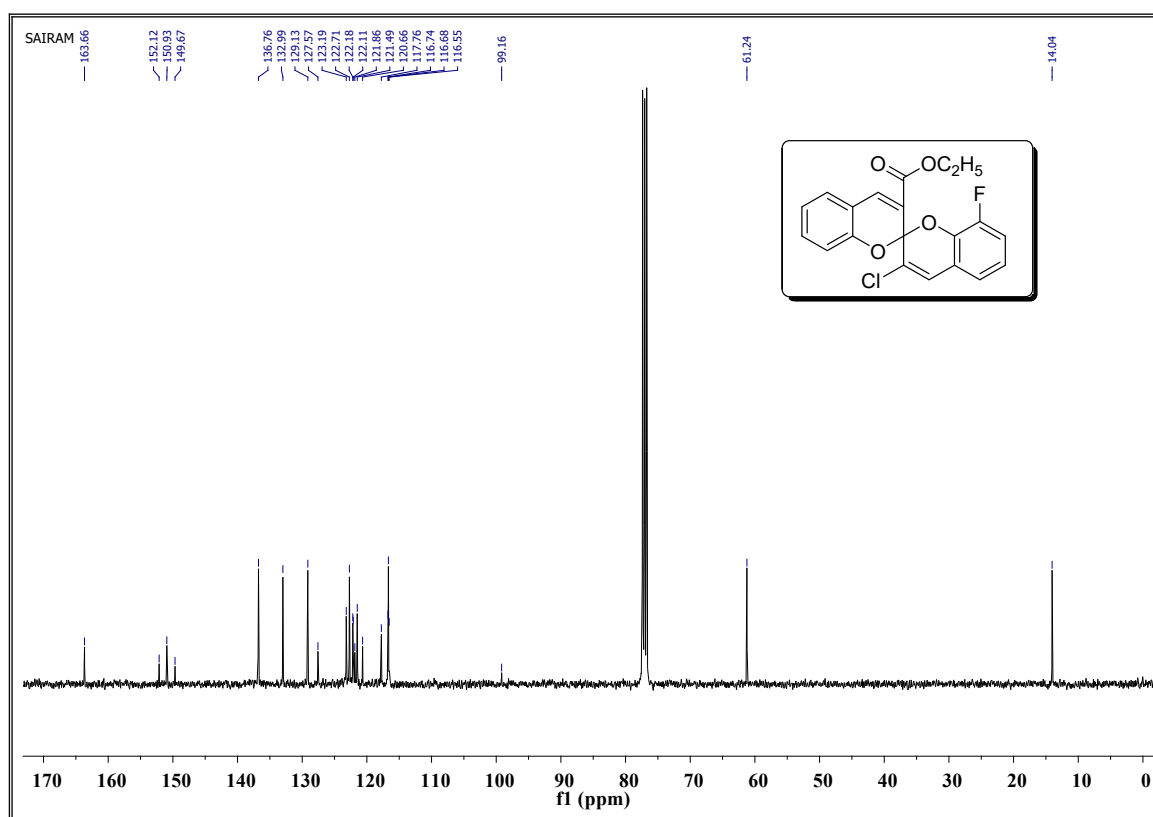

<sup>13</sup>C NMR spectrum of compound **3h**

MS Formula Results: + Scan (0.209 min) - BCR-3F-SP-KET 372.d (BCR-3F-SP-KET 372.d)

| m/z                                 | Ion                                                | Formula                                               | Abundance |       |             |          |           |            |                |             |               |            |          |     |
|-------------------------------------|----------------------------------------------------|-------------------------------------------------------|-----------|-------|-------------|----------|-----------|------------|----------------|-------------|---------------|------------|----------|-----|
| 395.0456                            | (M+Na) <sup>+</sup>                                | C <sub>20</sub> H <sub>14</sub> ClFNaO <sub>4</sub>   | 15676.7   |       |             |          |           |            |                |             |               |            |          |     |
| Best                                | Formula (M)                                        | Ion Formula                                           | Calc m/z  | Score | Cross Score | Mass     | Calc Mass | Diff (ppm) | Abs Diff (ppm) | Abund Match | Spacing Match | Mass Match | m/z      | DBE |
| <input checked="" type="checkbox"/> | C <sub>20</sub> H <sub>14</sub> ClF O <sub>4</sub> | C <sub>20</sub> H <sub>14</sub> ClF Na O <sub>4</sub> | 395.0457  | 85.12 |             | 372.0564 | 372.0565  | 0.07       | 0.07           | 60.89       | 84.46         | 100        | 395.0456 | 13  |

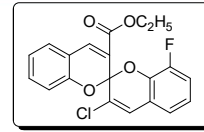

**Sample Name** BCR-3F-SP-KET 372    **Position** Vial 46    **Instrument Name** Instrument 1    **User Name**  
**Inj Vol** -1    **InjPosition**    **SampleType** Sample    **IRM Calibration Status** Success  
**Data Filename** BCR-3F-SP-KET 372.d    **ACQ Method** SCS.m    **Comment**    **Acquired Time** 6/6/2016 1:16:45 PM

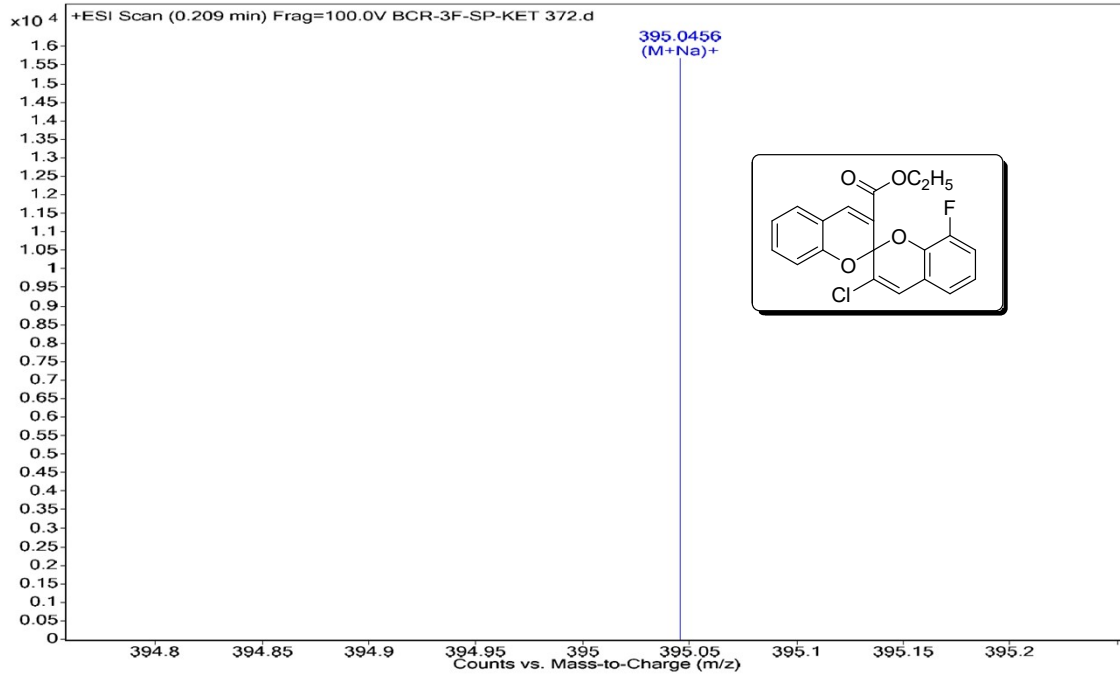

ESI-HRMS of compound 3h



MS Formula Results: + Scan (0.098-0.207 min) Sub - BCR-5-CL-SP-KET.d (BCR-5-CL-SP-KET.d)

| m/z                                 | Ion                                                            | Formula                                                          | Abundance |       |             |          |           |            |                |             |               |            |         |     |
|-------------------------------------|----------------------------------------------------------------|------------------------------------------------------------------|-----------|-------|-------------|----------|-----------|------------|----------------|-------------|---------------|------------|---------|-----|
| 411.013                             | (M+Na) <sup>+</sup>                                            | C <sub>20</sub> H <sub>14</sub> Cl <sub>2</sub> NaO <sub>4</sub> | 15381     |       |             |          |           |            |                |             |               |            |         |     |
| Best                                | Formula (M)                                                    | Ion Formula                                                      | Calc m/z  | Score | Cross Score | Mass     | Calc Mass | Diff (ppm) | Abs Diff (ppm) | Abund Match | Spacing Match | Mass Match | m/z     | DBE |
| <input checked="" type="checkbox"/> | C <sub>20</sub> H <sub>14</sub> Cl <sub>2</sub> O <sub>4</sub> | C <sub>20</sub> H <sub>14</sub> Cl <sub>2</sub> NaO <sub>4</sub> | 411.0161  | 38.53 |             | 388.0238 | 388.0269  | 7.96       | 7.96           | 0           | 42.31         | 59.75      | 411.013 | 13  |

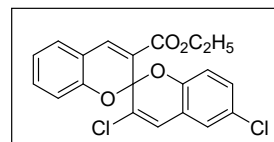

**Sample Name** BCR-5-CL-SP-KET    **Position** Vial 43    **Instrument Name** Instrument 1    **User Name**  
**Inj Vol** -1    **InjPosition**    **SampleType** Sample    **IRM Calibration Status** Success  
**Data Filename** BCR-5-CL-SP-KET.d    **ACQ Method** SCS.m    **Comment**    **Acquired Time** 6/1/2016 2:07:49 PM

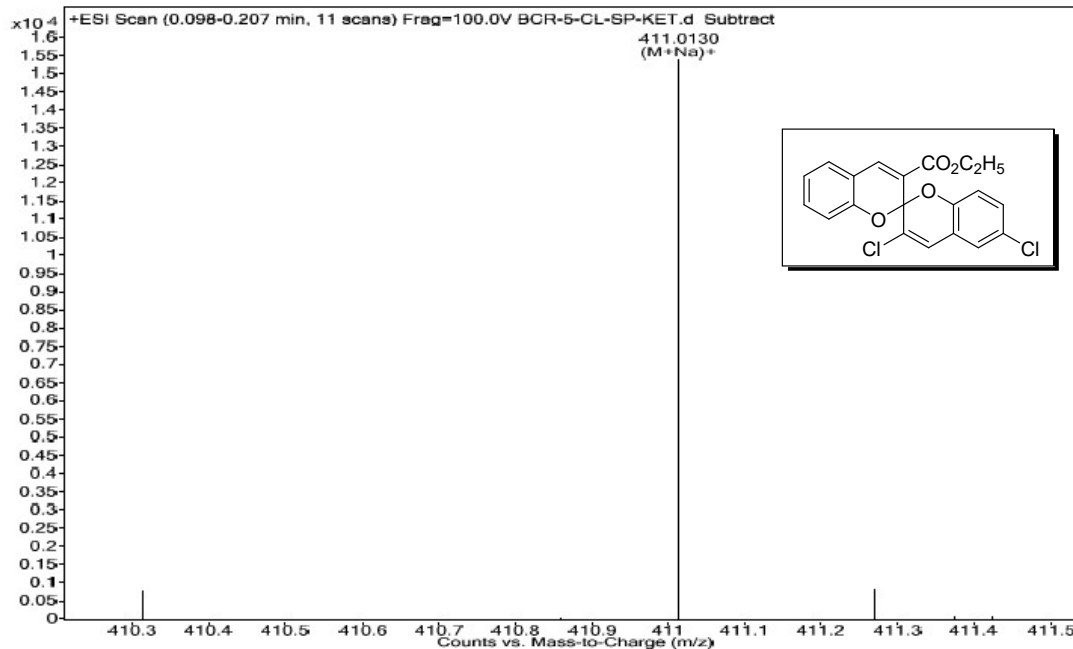

ESI-HRMS of compound **3i**



MS Formula Results: + Scan (0.104 min) - BCR-BR-SP-KET 433.d (BCR-BR-SP-KET 433.d)

| m/z      | Ion                 | Formula                                | Abundance |
|----------|---------------------|----------------------------------------|-----------|
| 454.9641 | (M+Na) <sup>+</sup> | C <sub>20</sub> H <sub>14</sub> BrClNa | 12035.4   |

  

| Best                                | Formula (M)                                        | Ion Formula                                          | Calc m/z | Score | Cross Score | Mass     | Calc Mass | Diff (ppm) | Abs Diff (ppm) | Abund Match | Spacing Match | Mass Match | m/z      | DBE |
|-------------------------------------|----------------------------------------------------|------------------------------------------------------|----------|-------|-------------|----------|-----------|------------|----------------|-------------|---------------|------------|----------|-----|
| <input checked="" type="checkbox"/> | C <sub>20</sub> H <sub>14</sub> BrClO <sub>4</sub> | C <sub>20</sub> H <sub>14</sub> BrClNaO <sub>4</sub> | 454.9656 | 94.18 |             | 431.9752 | 431.9764  | 2.74       | 2.74           | 97.07       | 92.18         | 93.45      | 454.9641 | 13  |

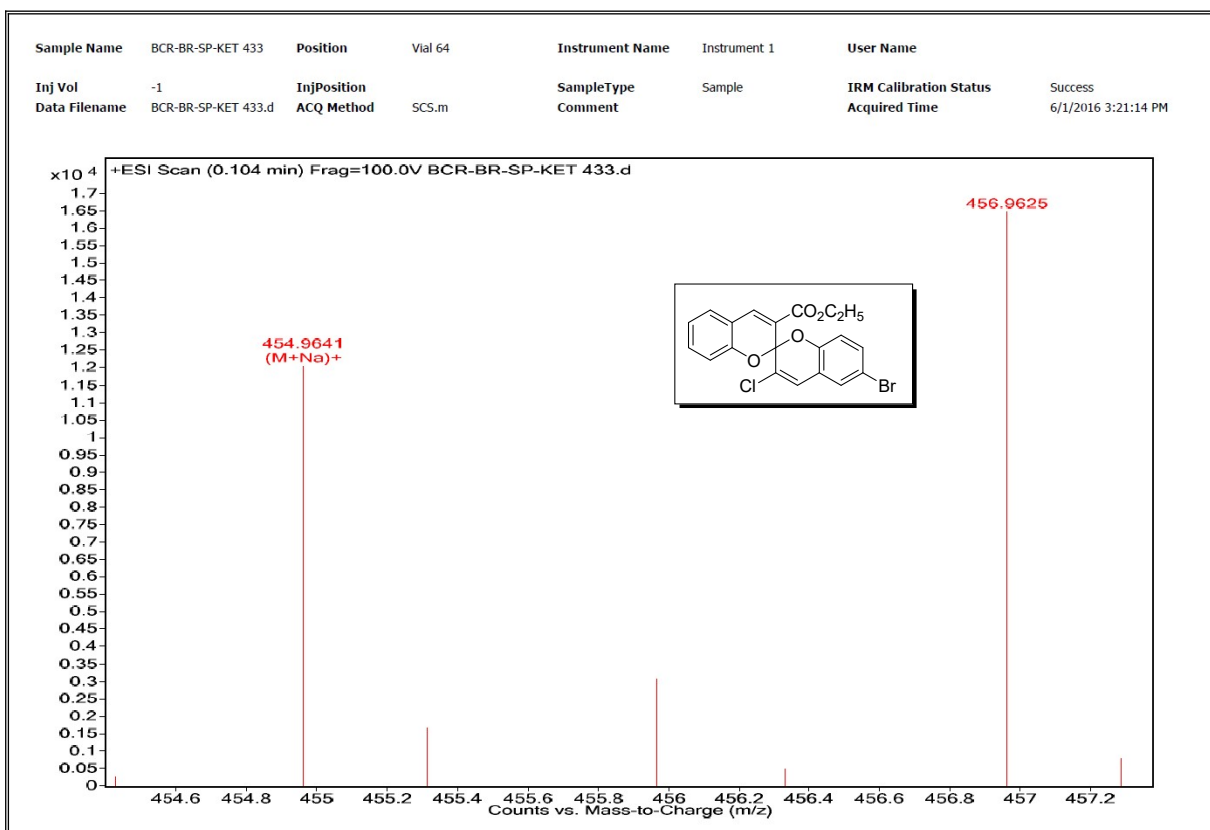

ESI-HRMS of compound **3k**

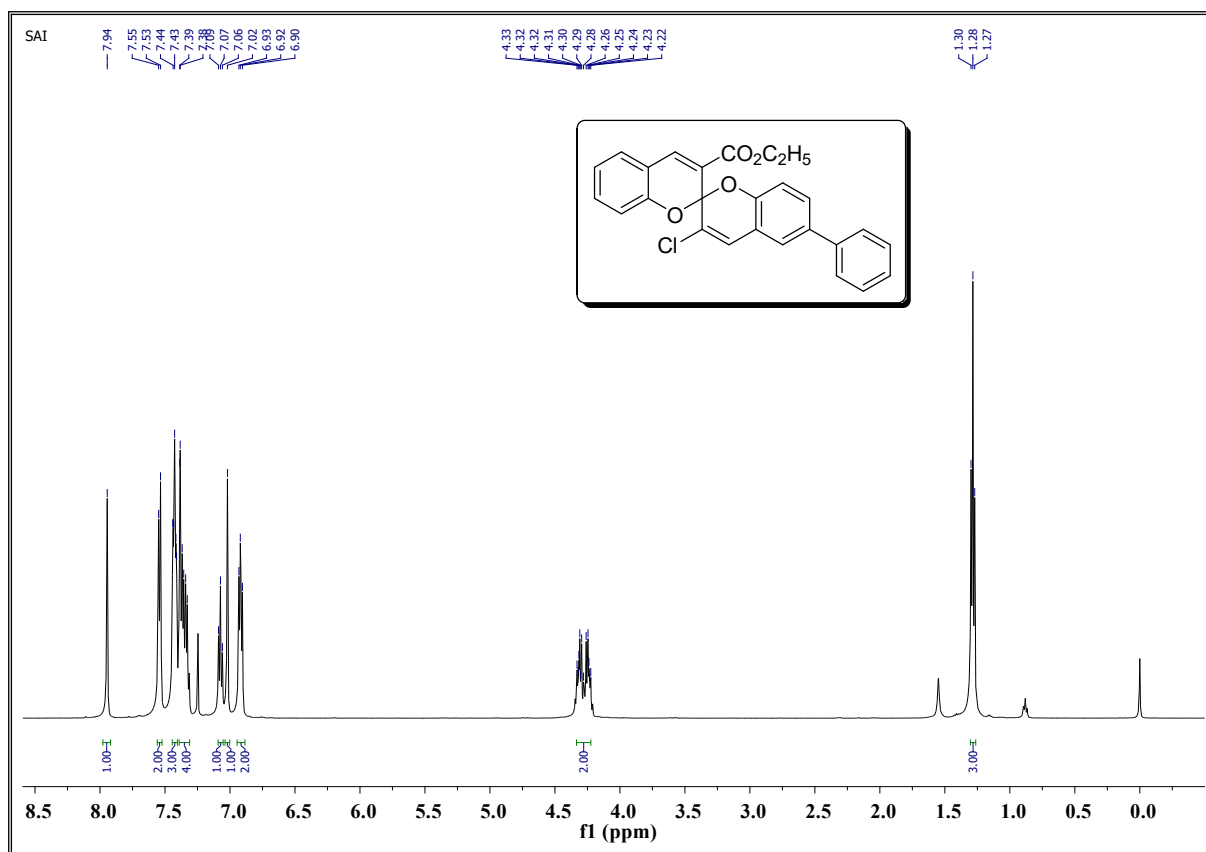

$^1\text{H}$  NMR spectrum of compound **3m**

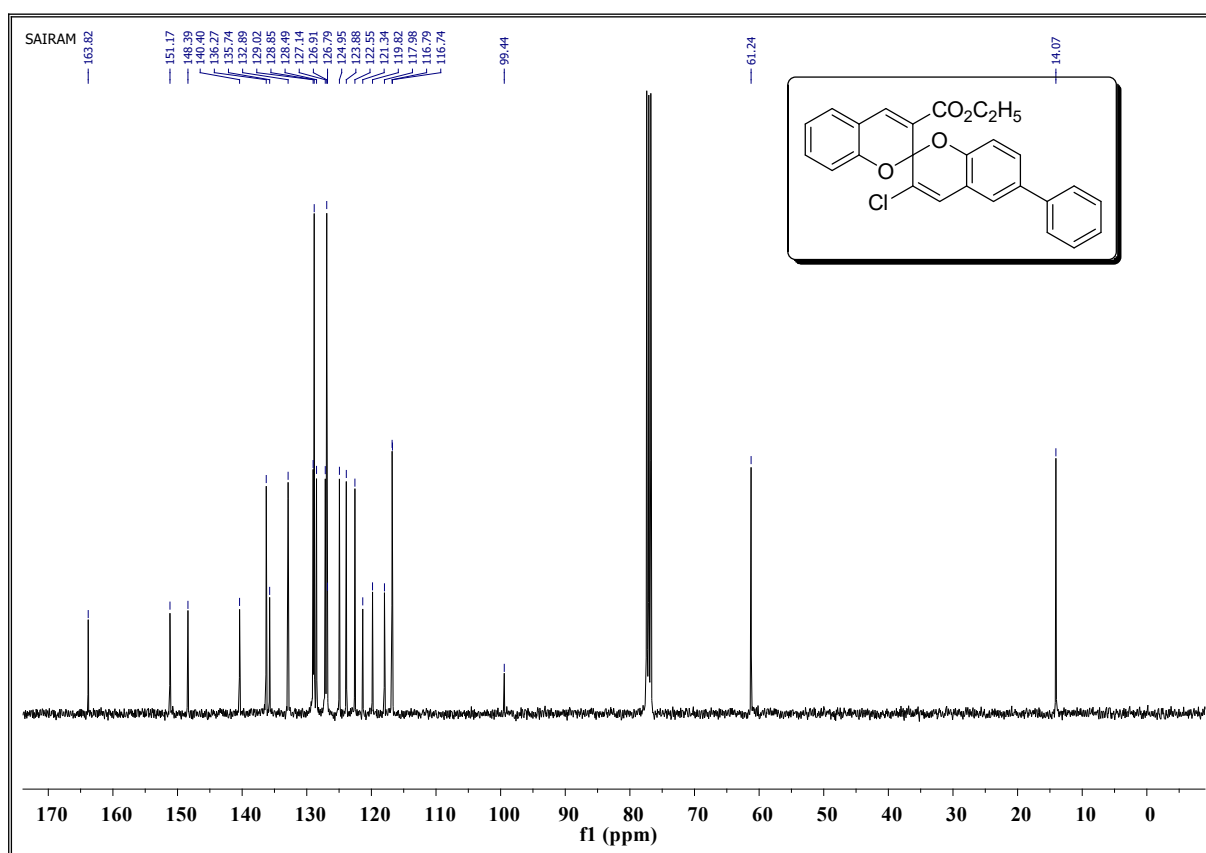

$^{13}\text{C}$  NMR spectrum of compound **3m**



MS Formula Results: + Scan (0.060-0.268 min) Sub - BCR-PH-SP-KET 430.d (BCR-PH-SP-KET 430.d)

| m/z     | Ion                 | Formula                                            | Abundance |
|---------|---------------------|----------------------------------------------------|-----------|
| 453.084 | (M+Na) <sup>+</sup> | C <sub>26</sub> H <sub>19</sub> ClNaO <sub>4</sub> | 53567.3   |

  

| Best                                | Formula (M)                                      | Ion Formula                                        | Calc m/z | Score | Cross Score | Mass     | Calc Mass | Diff (ppm) | Abs Diff (ppm) | Abund Match | Spacing Match | Mass Match | m/z     | DBE |
|-------------------------------------|--------------------------------------------------|----------------------------------------------------|----------|-------|-------------|----------|-----------|------------|----------------|-------------|---------------|------------|---------|-----|
| <input checked="" type="checkbox"/> | C <sub>26</sub> H <sub>19</sub> ClO <sub>4</sub> | C <sub>26</sub> H <sub>19</sub> ClNaO <sub>4</sub> | 453.0864 | 87.62 |             | 430.0948 | 430.0972  | 5.63       | 5.63           | 98.11       | 99.86         | 75.21      | 453.084 | 17  |

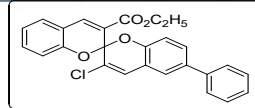

**Sample Name** BCR-PH-SP-KET 430    **Position** Vial 26    **Instrument Name** Instrument 1    **User Name**  
**Inj Vol** -1    **InjPosition**    **SampleType** Sample    **IRM Calibration Status** Success  
**Data Filename** BCR-PH-SP-KET 430.d    **ACQ Method** SCS.m    **Comment**    **Acquired Time** 5/11/2016 11:36:41 A

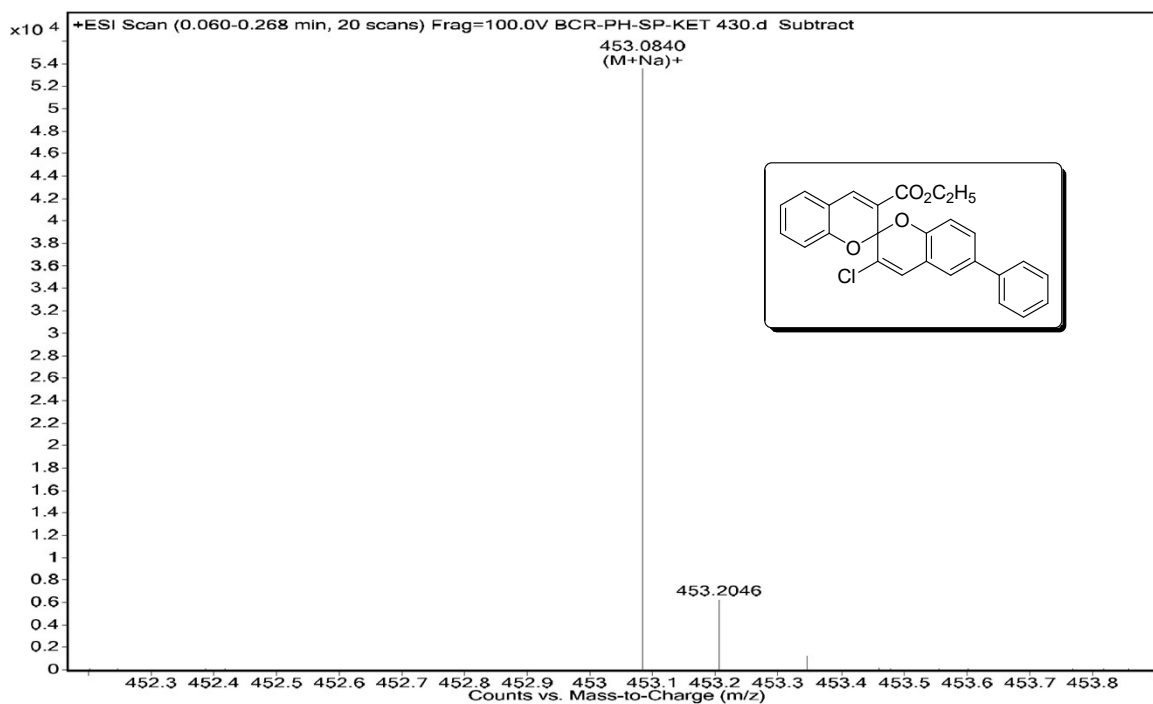

ESI-HRMS of compound **3m**

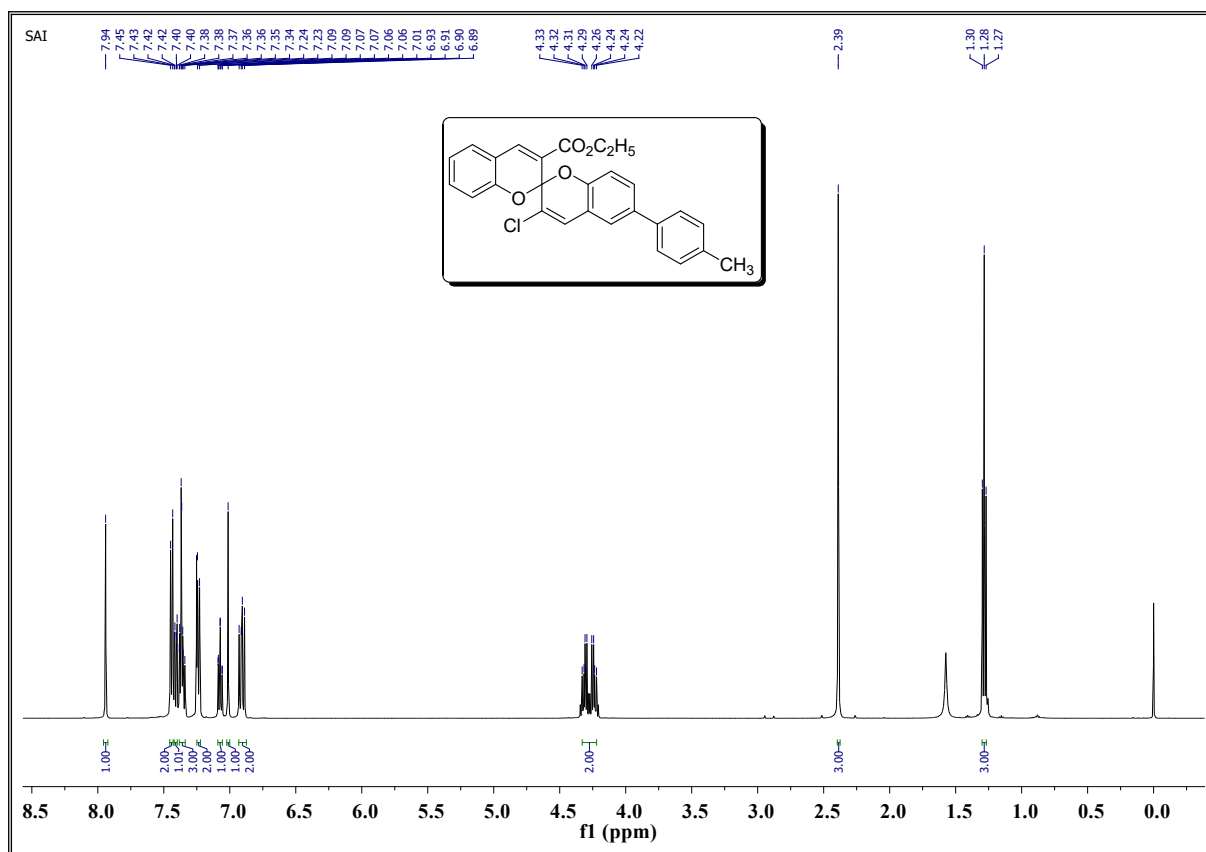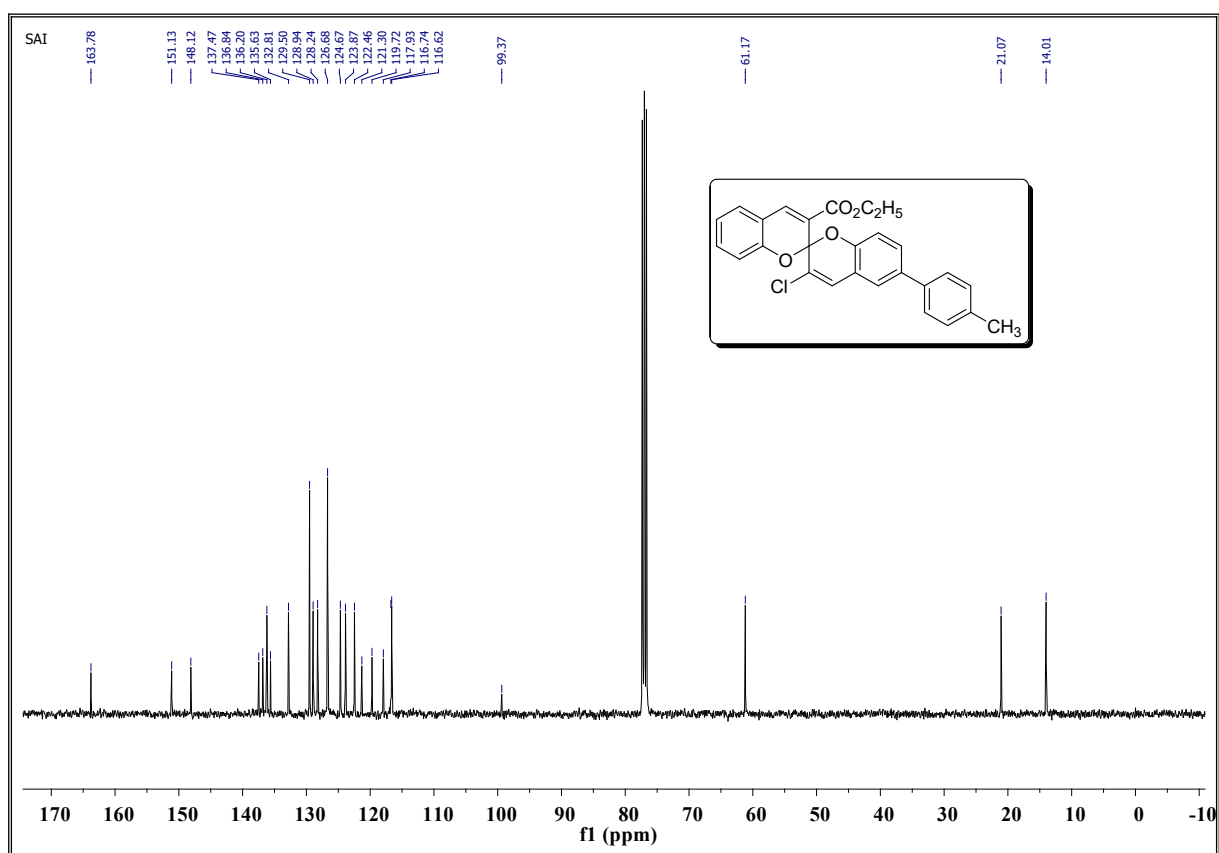

## MS Formula Results: + Scan (0.286 min) - BCR-ME-PH-444.d (BCR-ME-PH-444.d)

| m/z      | Ion                 | Formula                                            | Abundance |
|----------|---------------------|----------------------------------------------------|-----------|
| 467.1011 | (M+Na) <sup>+</sup> | C <sub>27</sub> H <sub>21</sub> ClNaO <sub>4</sub> | 12357.5   |

  

| Best                                | Formula (M)                                      | Ion Formula                                        | Calc m/z | Score | Score % | Cross Score | Mass     | Calc Mass | Diff (ppm) | Abs Diff (ppm) | Abund Match | Spacing Match | Mass Match | m/z      | DBE |
|-------------------------------------|--------------------------------------------------|----------------------------------------------------|----------|-------|---------|-------------|----------|-----------|------------|----------------|-------------|---------------|------------|----------|-----|
| <input checked="" type="checkbox"/> | C <sub>27</sub> H <sub>21</sub> ClO <sub>4</sub> | C <sub>27</sub> H <sub>21</sub> ClNaO <sub>4</sub> | 467.1021 | 89.18 |         |             | 444.1118 | 444.1128  | 2.3        | 2.3            | 97.87       | 66.65         | 95.24      | 467.1011 | 17  |

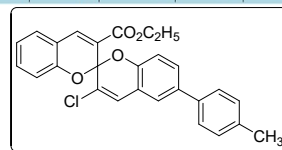

Sample Name BCR-ME-PH-444      Position Vial 48      Instrument Name Instrument 1      User Name  
Inj Vol -1      InjPosition      SampleType Sample      IRM Calibration Status Success  
Data Filename BCR-ME-PH-444.d      ACQ Method SCS.m      Comment      Acquired Time 7/4/2016 1:25:19 PM

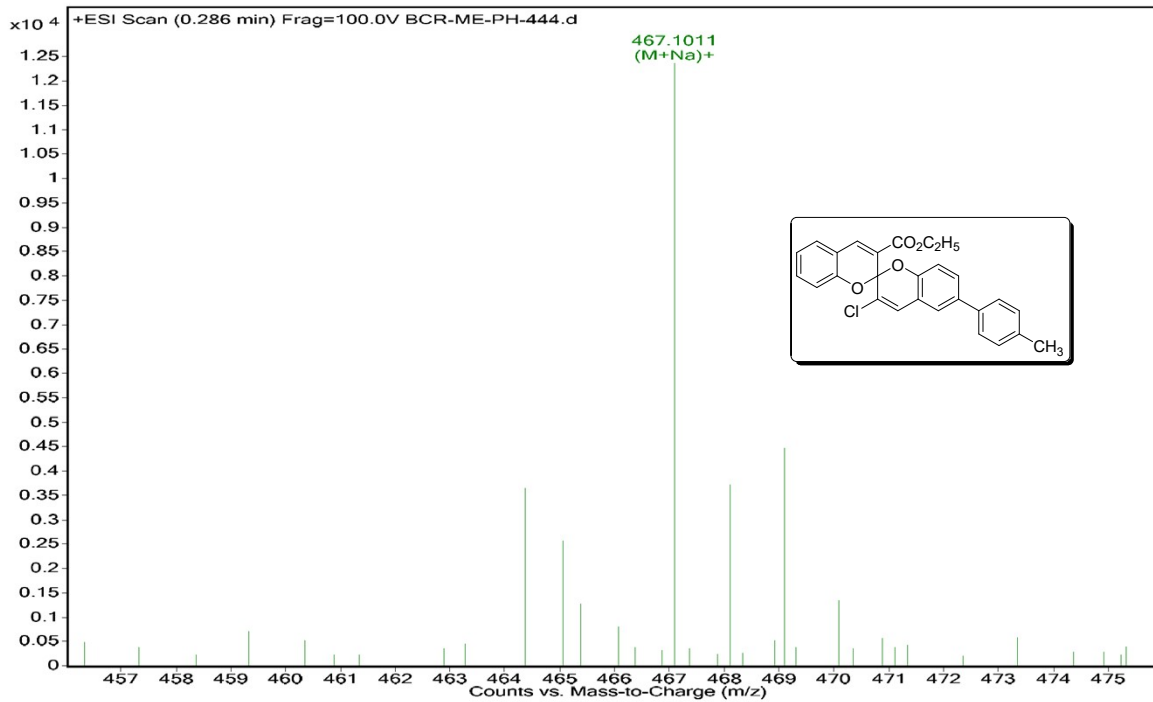ESI-HRMS of compound **3n**

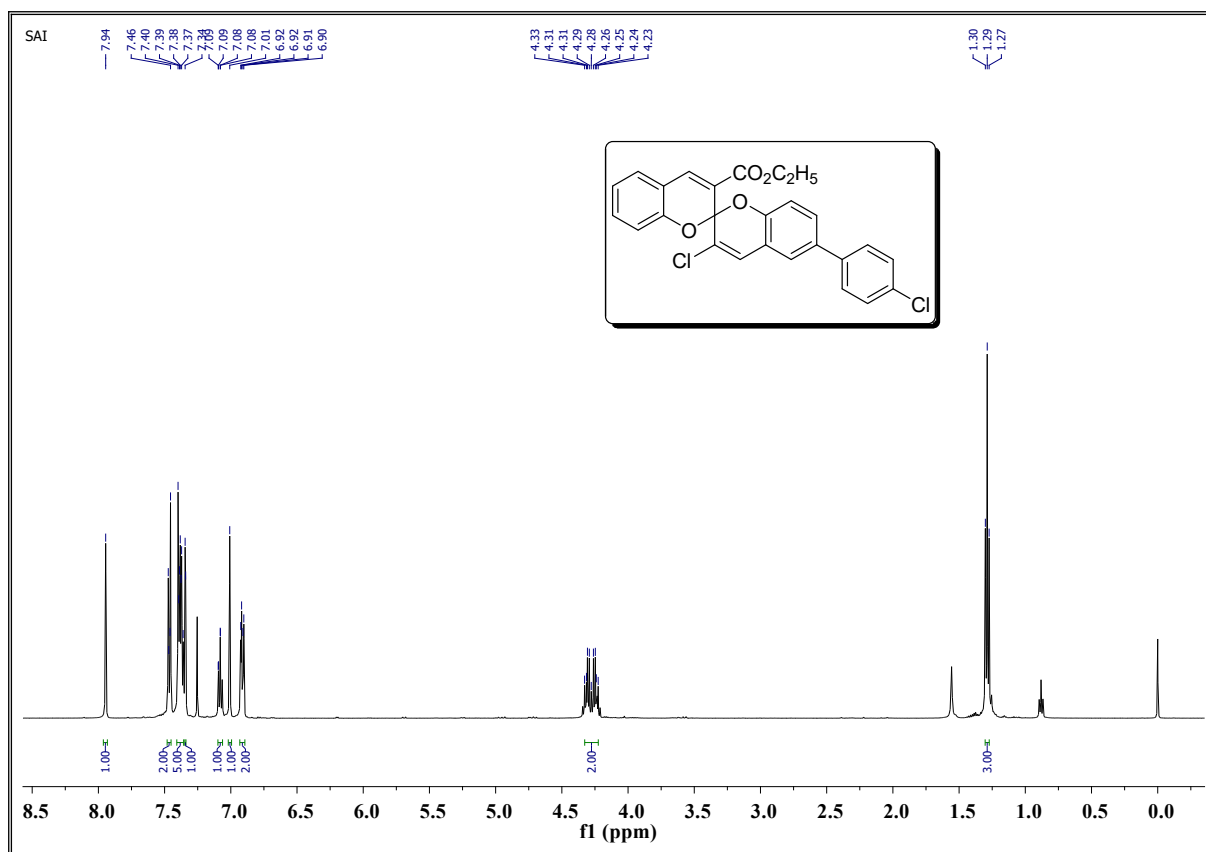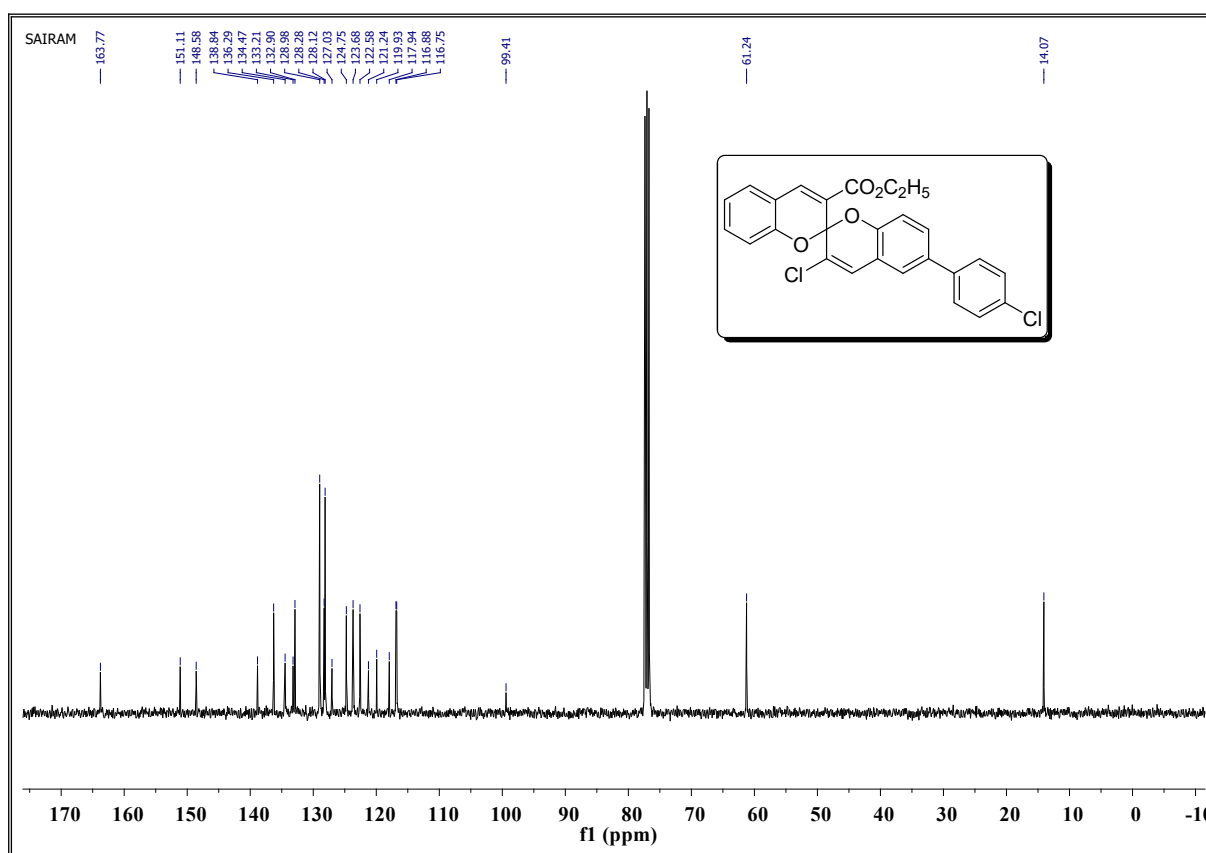

MS Formula Results: + Scan (0.455-1.430 min) - BCR-CL-PH-SP-KET-464.d (BCR-CL-PH-SP-KET-464.d)

| m/z      | Ion                 | Formula                                                          | Abundance |
|----------|---------------------|------------------------------------------------------------------|-----------|
| 487.0455 | (M+Na) <sup>+</sup> | C <sub>26</sub> H <sub>18</sub> Cl <sub>2</sub> NaO <sub>4</sub> | 110466.7  |

  

| Best                                | Formula (M)                                                    | Ion Formula                                                      | Calc m/z | Score | Cross Score | Mass     | Calc Mass | Diff (ppm) | Abs Diff (ppm) | Abund Match | Spacing Match | Mass Match | m/z      | DBE |
|-------------------------------------|----------------------------------------------------------------|------------------------------------------------------------------|----------|-------|-------------|----------|-----------|------------|----------------|-------------|---------------|------------|----------|-----|
| <input checked="" type="checkbox"/> | C <sub>26</sub> H <sub>18</sub> Cl <sub>2</sub> O <sub>4</sub> | C <sub>26</sub> H <sub>18</sub> Cl <sub>2</sub> NaO <sub>4</sub> | 487.0474 | 91.74 |             | 464.0562 | 464.0582  | 4.34       | 4.34           | 98.89       | 99.88         | 83.39      | 487.0455 | 17  |

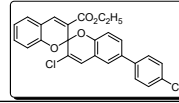

**Sample Name** BCR-CL-PH-SP-KET-464    **Position** Vial 37    **Instrument Name** Instrument 1    **User Name**  
**Inj Vol** -1    **InjPosition**    **SampleType** Sample    **IRM Calibration Status** Success  
**Data Filename** BCR-CL-PH-SP-KET-464    **ACQ Method** SCS.m    **Comment**    **Acquired Time** 7/4/2016 12:47:14 PM

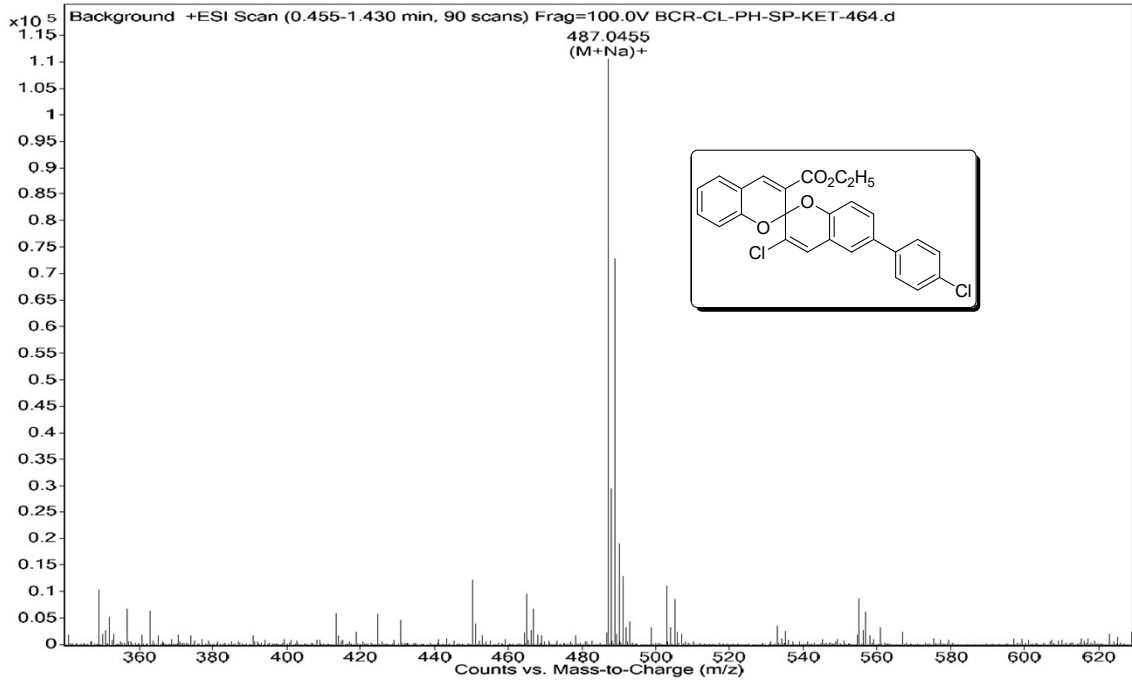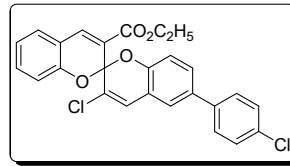

ESI-HRMS of compound 30

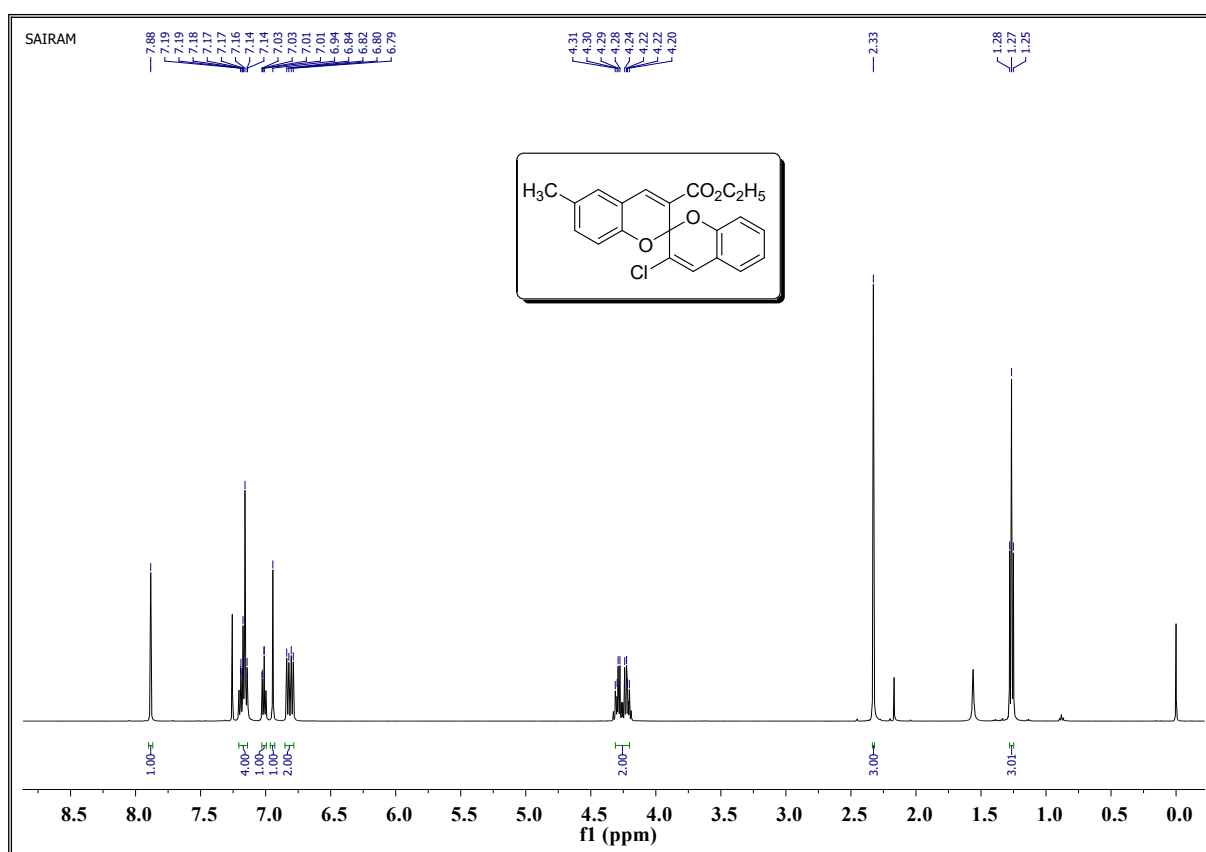

$^1\text{H}$  NMR spectrum of compound **3p**

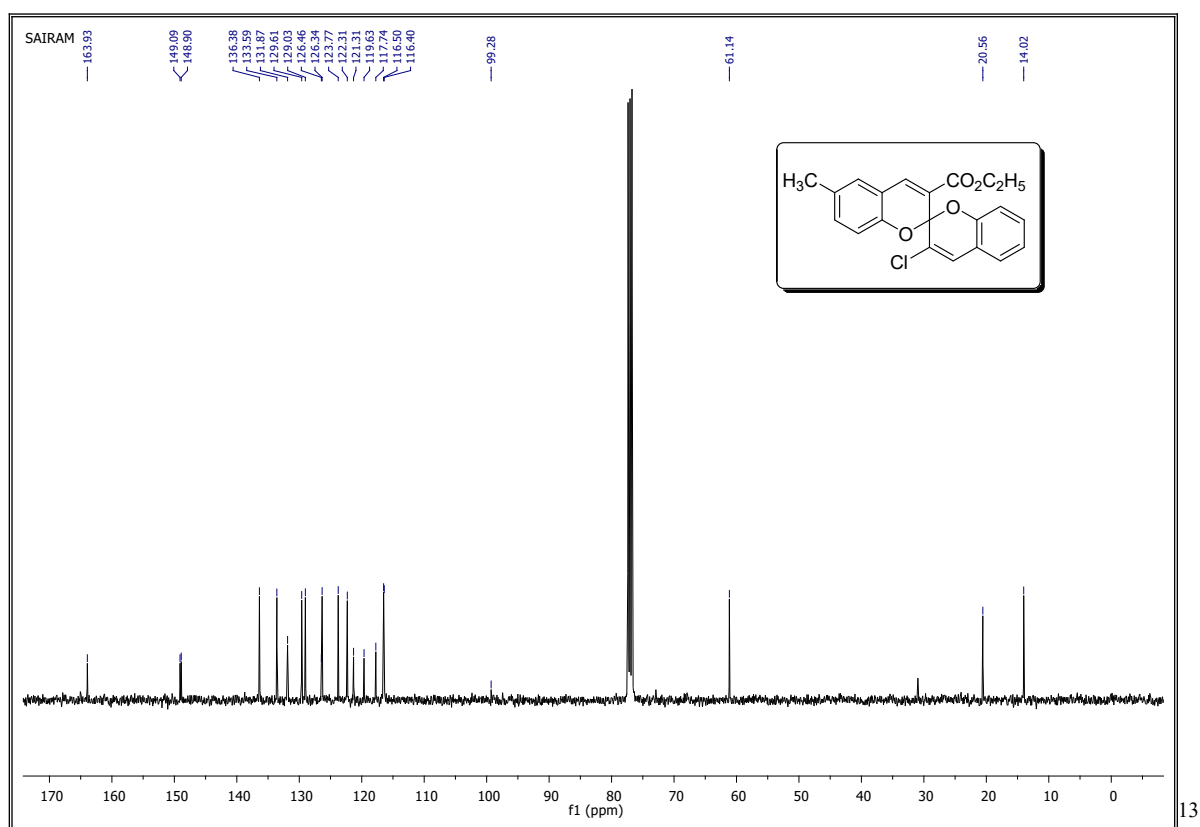

$^{13}\text{C}$  NMR spectrum of compound **3p**

MS Formula Results: + Scan (0.152 min) - BCR-SP-KET-ME 368.d (BCR-SP-KET-ME 368.d)

| m/z      | Ion                | Formula                                          | Abundance |
|----------|--------------------|--------------------------------------------------|-----------|
| 369.0857 | (M+H) <sup>+</sup> | C <sub>21</sub> H <sub>18</sub> ClO <sub>4</sub> | 76474.8   |

  

| Best                                | Formula (M)                                      | Ion Formula                                      | Calc m/z | Score | Cross Score | Mass     | Calc Mass | Diff (ppm) | Abs Diff (ppm) | Abund Match | Spacing Match | Mass Match | m/z      | DBE |
|-------------------------------------|--------------------------------------------------|--------------------------------------------------|----------|-------|-------------|----------|-----------|------------|----------------|-------------|---------------|------------|----------|-----|
| <input checked="" type="checkbox"/> | C <sub>21</sub> H <sub>17</sub> ClO <sub>4</sub> | C <sub>21</sub> H <sub>18</sub> ClO <sub>4</sub> | 369.0888 | 76.24 |             | 368.0784 | 368.0815  | 8.39       | 8.39           | 89.95       | 99.94         | 56.18      | 369.0857 | 13  |

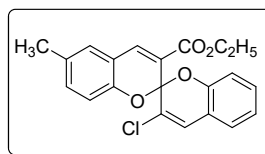

|                      |                     |                    |         |                        |              |                               |                       |
|----------------------|---------------------|--------------------|---------|------------------------|--------------|-------------------------------|-----------------------|
| <b>Sample Name</b>   | BCR-SP-KET-ME 368   | <b>Position</b>    | Vial 37 | <b>Instrument Name</b> | Instrument 1 | <b>User Name</b>              |                       |
| <b>Inj Vol</b>       | -1                  | <b>InjPosition</b> |         | <b>SampleType</b>      | Sample       | <b>IRM Calibration Status</b> | Success               |
| <b>Data Filename</b> | BCR-SP-KET-ME 368.d | <b>ACQ Method</b>  | SCS.m   | <b>Comment</b>         |              | <b>Acquired Time</b>          | 5/11/2016 12:14:15 PM |

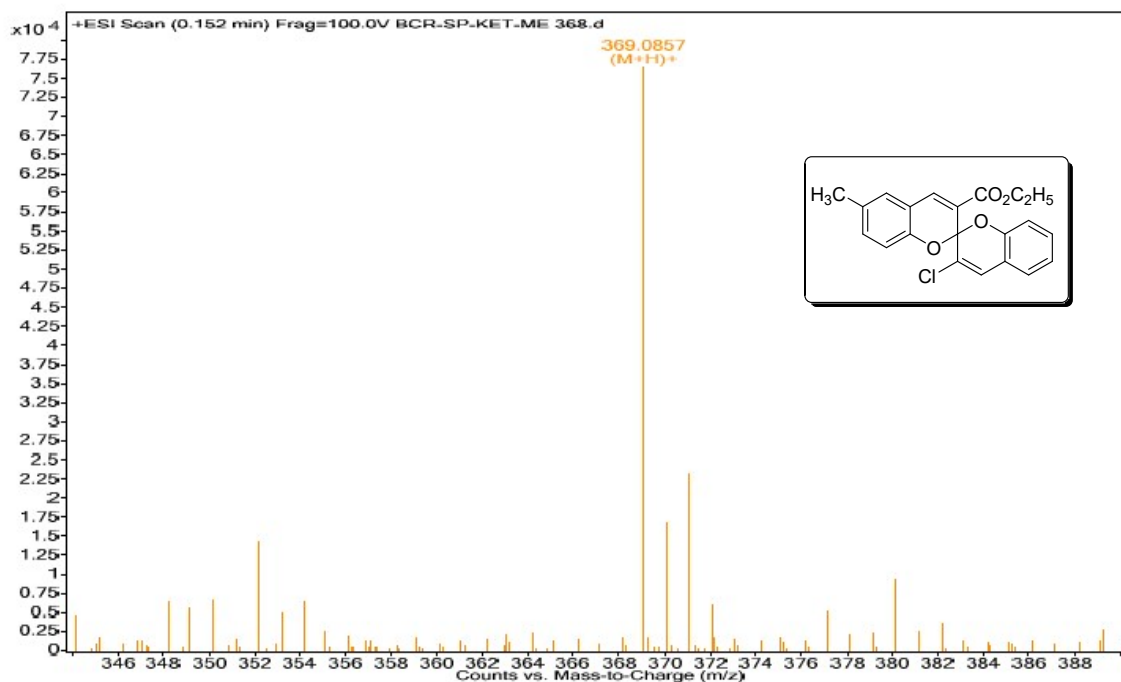

ESI-HRMS of compound **3p**

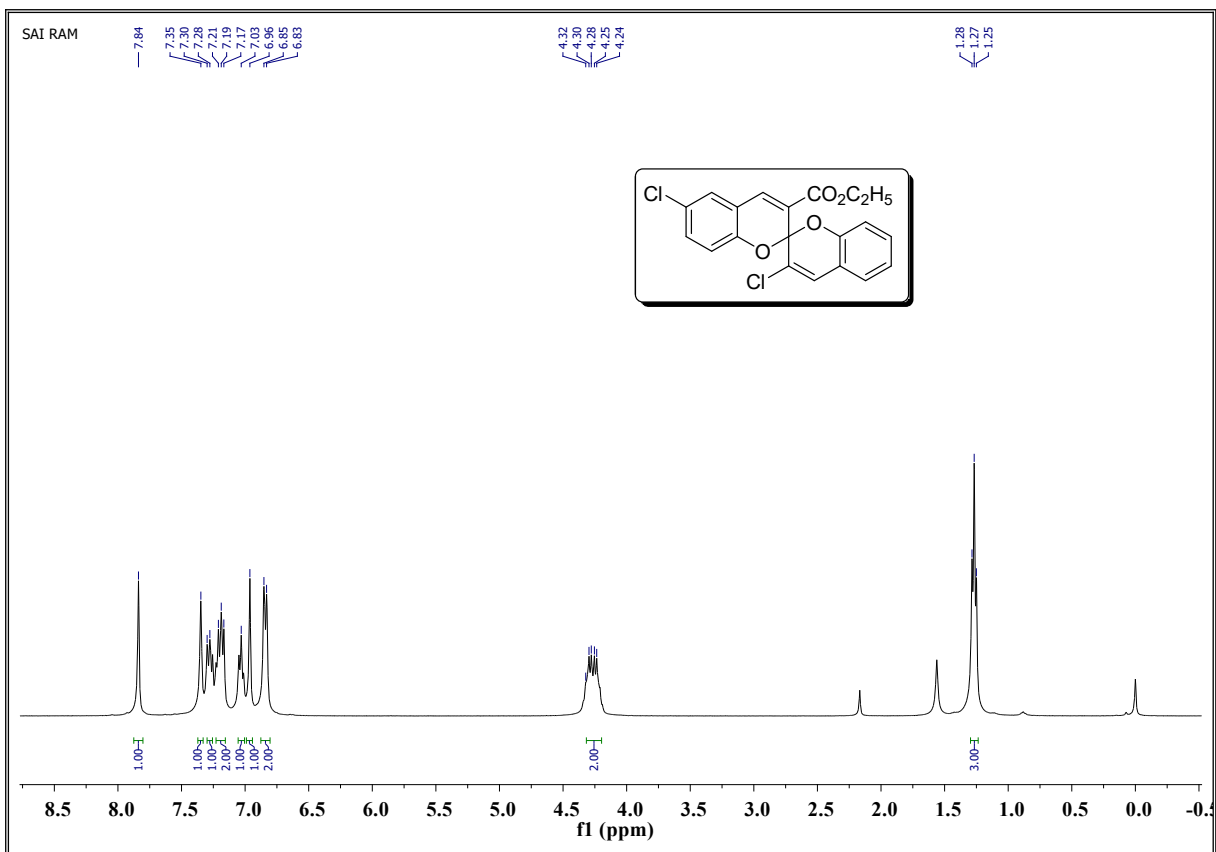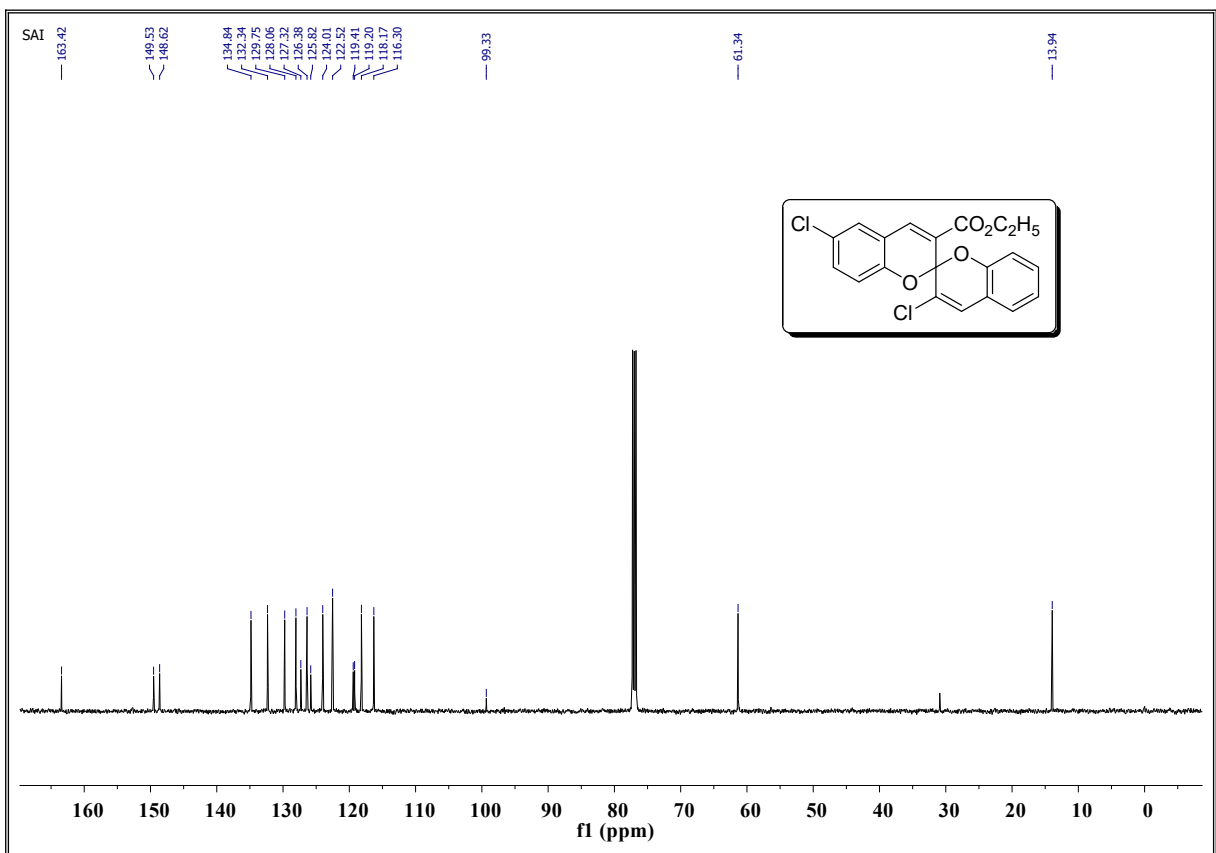



MS Formula Results: + Scan (0.158 min) - BCR-SP-KET-388.d (BCR-SP-KET-388.d)

| m/z      | Ion                 | Formula                                                          | Abundance |
|----------|---------------------|------------------------------------------------------------------|-----------|
| 411.0132 | (M+Na) <sup>+</sup> | C <sub>20</sub> H <sub>14</sub> Cl <sub>2</sub> NaO <sub>4</sub> | 164896.5  |

  

| Best                                | Formula (M)                                                    | Ion Formula                                                      | Calc m/z | Score | Cross Score | Mass     | Calc Mass | Diff (ppm) | Abs Diff (ppm) | Abund Match | Spacing Match | Mass Match | m/z      | DBE |
|-------------------------------------|----------------------------------------------------------------|------------------------------------------------------------------|----------|-------|-------------|----------|-----------|------------|----------------|-------------|---------------|------------|----------|-----|
| <input checked="" type="checkbox"/> | C <sub>20</sub> H <sub>14</sub> Cl <sub>2</sub> O <sub>4</sub> | C <sub>20</sub> H <sub>14</sub> Cl <sub>2</sub> NaO <sub>4</sub> | 411.0161 | 79.9  |             | 388.0238 | 388.0269  | 7.96       | 7.96           | 98.79       | 97.6          | 59.72      | 411.0132 | 13  |

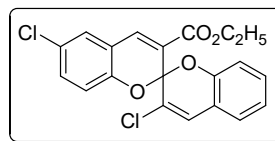

**Sample Name** BCR-SP-KET-388    **Position** Vial 52    **Instrument Name** Instrument 1    **User Name**  
**Inj Vol** -1    **InjPosition**    **SampleType** Sample    **IRM Calibration Status** Success  
**Data Filename** BCR-SP-KET-388.d    **ACQ Method** SCS.m    **Comment**    **Acquired Time** 6/5/2016 1:37:49 PM

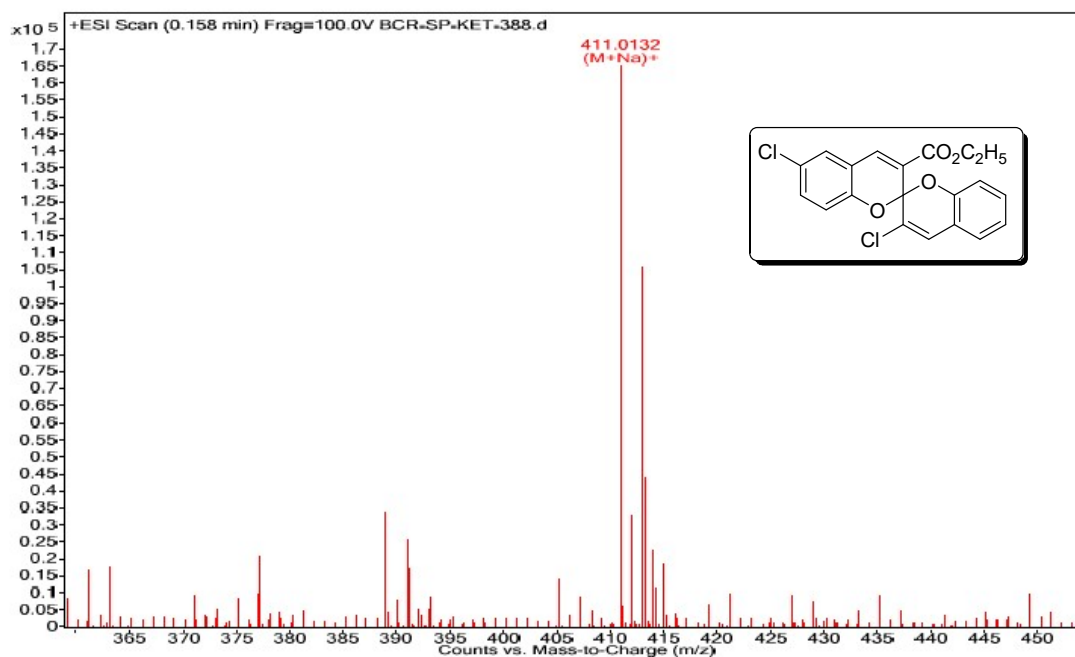

ESI-HRMS of compound 3s

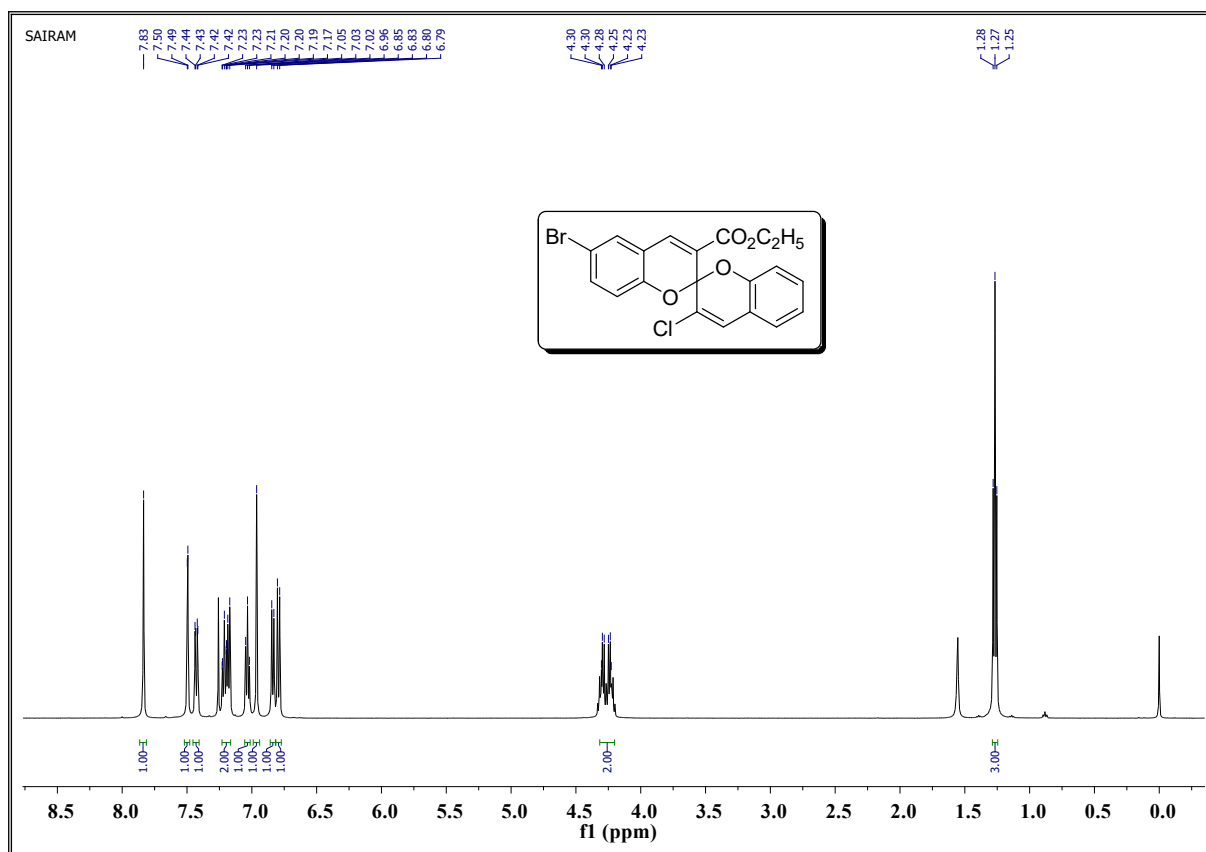

$^1\text{H}$  NMR spectrum of compound **3t**

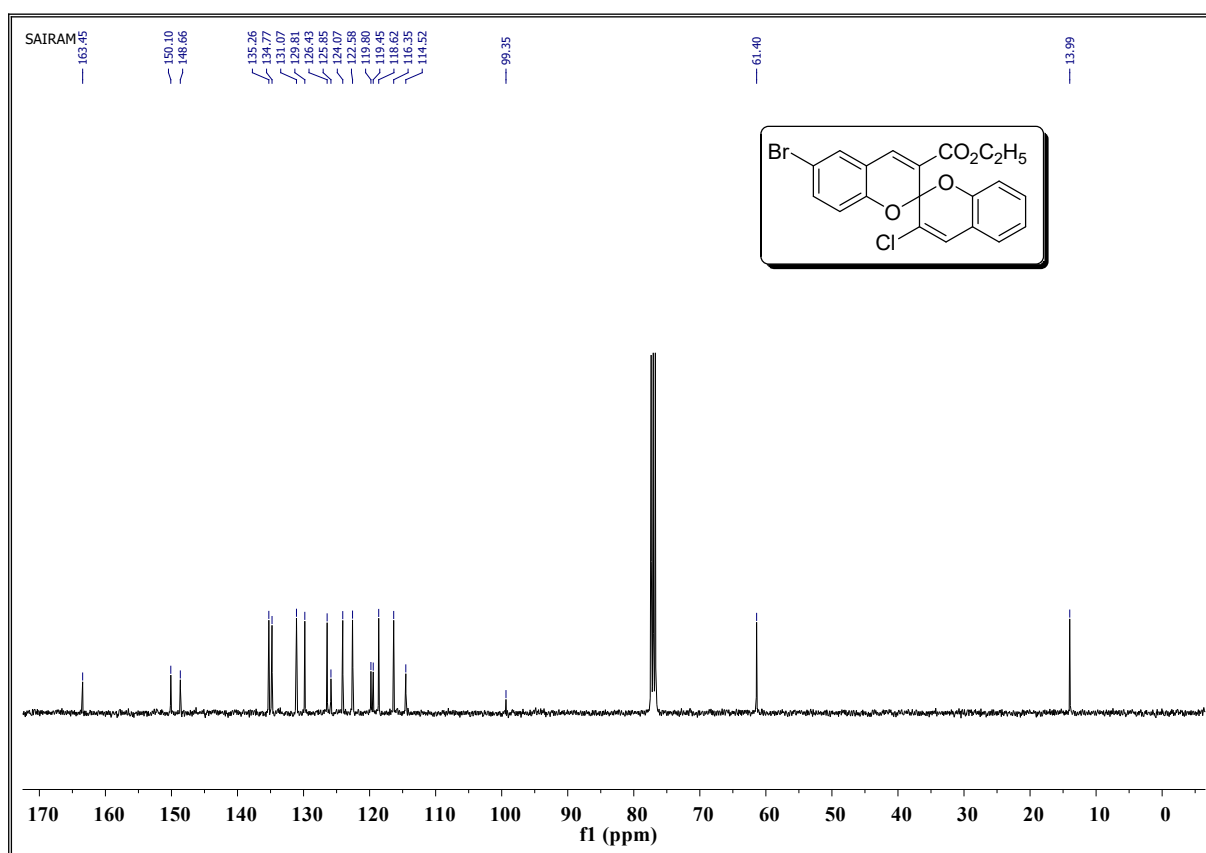

$^{13}\text{C}$  NMR spectrum of compound **3t**

MS Formula Results: + Scan (0.093-0.203 min) Sub - BCR-BR-SP-KET 433.d (BCR-BR-SP-KET 433.d)

| m/z     | Ion                 | Formula                                              | Abundance |
|---------|---------------------|------------------------------------------------------|-----------|
| 454.963 | (M+Na) <sup>+</sup> | C <sub>20</sub> H <sub>14</sub> BrClNaO <sub>4</sub> | 12441     |

  

| Best                                | Formula (M)                                        | Ion Formula                                          | Calc m/z | Score | Cross Score | Mass     | Calc Mass | Diff (ppm) | Abs Diff (ppm) | Abund Match | Spacing Match | Mass Match | m/z     | DBE |
|-------------------------------------|----------------------------------------------------|------------------------------------------------------|----------|-------|-------------|----------|-----------|------------|----------------|-------------|---------------|------------|---------|-----|
| <input checked="" type="checkbox"/> | C <sub>20</sub> H <sub>14</sub> BrClO <sub>4</sub> | C <sub>20</sub> H <sub>14</sub> BrClNaO <sub>4</sub> | 454.9656 | 88.88 |             | 431.9741 | 431.9764  | 5.32       | 5.32           | 98.96       | 99.64         | 77.46      | 454.963 | 13  |

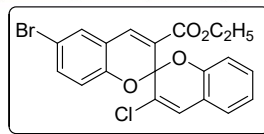

**Sample Name** BCR-BR-SP-KET 433    **Position** Vial 64    **Instrument Name** Instrument 1    **User Name**  
**Inj Vol** -1    **InjPosition**    **SampleType** Sample    **IRM Calibration Status** Success  
**Data Filename** BCR-BR-SP-KET 433.d    **ACQ Method** SCS.m    **Comment**    **Acquired Time** 6/1/2016 3:21:14 PM

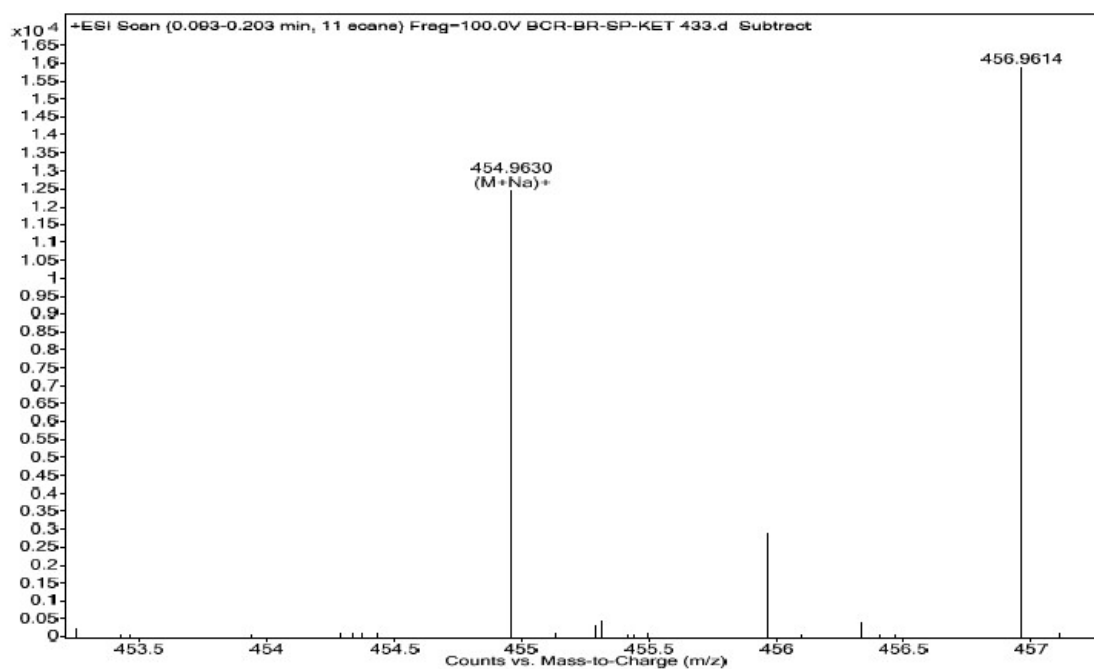

ESI-HRMS of compound 3t



MS Formula Results: + Scan (0.077-0.154 min) Sub - BCR-SP-KET-PH-430.d (BCR-SP-KET-PH-430.d)

| m/z      | Ion                 | Formula                                            | Abundance |
|----------|---------------------|----------------------------------------------------|-----------|
| 453.0858 | (M+Na) <sup>+</sup> | C <sub>26</sub> H <sub>19</sub> ClNaO <sub>4</sub> | 13196.3   |

  

| Best                                | Formula (M)                                      | Ion Formula                                        | Calc. m/z | Score | Cross Score | Mass     | Calc. Mass | Diff (ppm) | Abs. Diff (ppm) | Abund. Match | Spacing Match | Mass Match | m/z      | DBE |
|-------------------------------------|--------------------------------------------------|----------------------------------------------------|-----------|-------|-------------|----------|------------|------------|-----------------|--------------|---------------|------------|----------|-----|
| <input checked="" type="checkbox"/> | C <sub>26</sub> H <sub>19</sub> ClO <sub>4</sub> | C <sub>26</sub> H <sub>19</sub> ClNaO <sub>4</sub> | 453.0864  | 98.61 |             | 430.0966 | 430.0972   | 1.42       | 1.42            | 98.92        | 99.04         | 98.2       | 453.0858 | 17  |

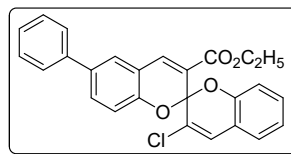

**Sample Name** BCR-SP-KET-PH-430    **Position** Vial 72    **Instrument Name** Instrument 1    **User Name**  
**Inj Vol** -1    **InjPosition**    **SampleType** Sample    **IRM Calibration Status** Success  
**Data Filename** BCR-SP-KET-PH-430.d    **ACQ Method** SCS.m    **Comment**    **Acquired Time** 6/1/2016 3:49:12 PM

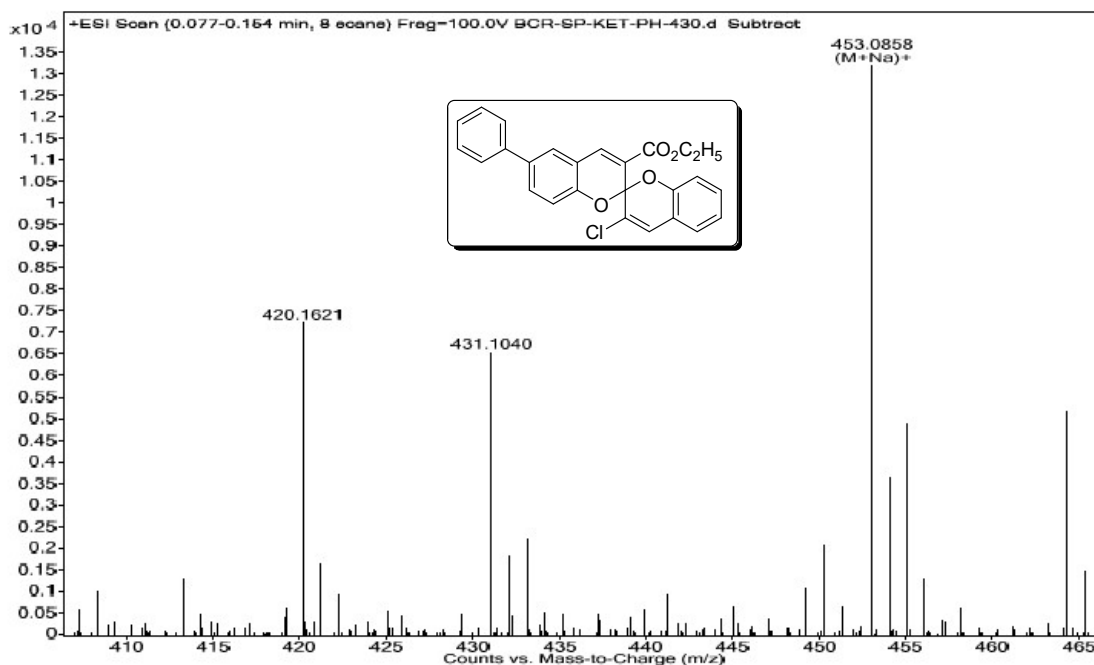

ESI-HRMS of compound 3u

**4. X-ray Crystallography:** X-ray data for the compound were collected at room temperature using a Bruker Smart Apex CCD diffractometer with graphite monochromated MoK $\alpha$  radiation ( $\lambda=0.71073\text{\AA}$ ) with  $\omega$ -scan method [1]. Preliminary lattice parameters and orientation matrices were obtained from four sets of frames.

Integration and scaling of intensity data was accomplished using SAINT program [1]. The structure was solved by direct methods using SHELXS97 [2] and refinement was carried out by full-matrix least-squares technique using SHELXL97 [2]. Anisotropic displacement parameters were included for all non-hydrogen atoms. All H atoms were positioned geometrically and treated as riding on their parent C atoms [C-H = 0.93-0.97  $\text{\AA}$  and  $U_{\text{iso}}(\text{H}) = 1.5U_{\text{eq}}(\text{C})$  for methyl H or  $1.2U_{\text{eq}}(\text{C})$  for other H atoms]. The methyl groups were allowed to rotate but not to tip.

**Crystal Data for 3c:** C<sub>21</sub>H<sub>17</sub>O<sub>4</sub>Cl ( $M=368.82$ ): triclinic, space group P-1 (no. 2),  $a = 8.7937(7)\text{\AA}$ ,  $b = 10.0005(8)\text{\AA}$ ,  $c = 11.2448(9)\text{\AA}$ ,  $\alpha = 92.850(1)^\circ$ ,  $\beta = 111.870(1)^\circ$ ,  $\gamma = 95.702(1)^\circ$ ,  $V = 909.14(13)\text{\AA}^3$ ,  $Z = 2$ ,  $T = 294.15\text{ K}$ ,  $\mu(\text{MoK}\alpha) = 0.233\text{ mm}^{-1}$ ,  $D_{\text{calc}} = 1.3472\text{ g/mm}^3$ , 10400 reflections measured ( $3.92 \leq 2\theta \leq 56.76$ ), 4239 unique ( $R_{\text{int}} = 0.0180$ ) which were used in all calculations. The final  $R_1$  was 0.0443 ( $I \geq 2u(I)$ ) and  $wR_2$  was 0.1369 (all data). CCDC 1502138 contains supplementary Crystallographic data for the structure. These data can be obtained free of charge at [www.ccdc.cam.ac.uk/conts/retrieving.html](http://www.ccdc.cam.ac.uk/conts/retrieving.html) [or from the Cambridge Crystallographic Data Centre (CCDC), 12 Union Road, Cambridge CB2 1EZ, UK; fax: +44(0) 1223 336 033; email: [deposit@ccdc.cam.ac.uk](mailto:deposit@ccdc.cam.ac.uk)].

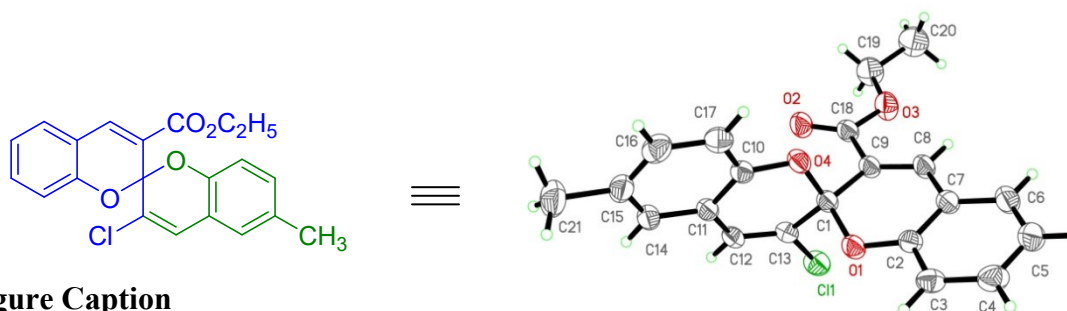

**Figure Caption**

A view of compound **3c**, showing the atom-labelling scheme. Displacement ellipsoids are drawn at the 30% probability level and H atoms are represented by circles of arbitrary radii.

1. Bruker (2001). SAINT (Version 6.28a) & SMART (Version 5.625). Bruker AXS Inc., Madison, Wisconsin, USA.
2. Sheldrick, G. M. (2015). Acta Cryst. C71, 3-8.

### Response to the Reviewers about suggested experiments

Is it possible to obtain the described compounds (with the same substituents in the aromatic cores) in one step from 2 equivalents of the corresponding salicylaldehyde and ethyl 4-chloroacetoacetate under the conditions? I believe that such an experiment will make the manuscript interesting not only for those who work with *2H*-chromenes, that is, it will expand the scope of possible readers.

**Reaction between salicylaldehyde and ethyl 4-chloroacetoacetate:** Couple of one-pot reactions have been carried out as per the suggestions of Reviewer and described below.

A)  $\text{BF}_3 \cdot \text{OEt}_2$  (3.0 equiv) was added to a stirred solution of salicylaldehyde (2.0 equiv) in dry  $\text{CH}_2\text{Cl}_2$  at 0 °C under nitrogen atmosphere in presence of 4 Å molecular sieves and reaction was continued for 30 minutes. The reaction mixture was turned to lemon yellow color from colorless after addition of  $\text{BF}_3 \cdot \text{OEt}_2$ . The ethyl 4-chloroacetoacetate (1.0 equiv) in dry  $\text{CH}_2\text{Cl}_2$  was added slowly to the reaction mixture at the same temperature and continued for 24 hours. The reaction upon workup, *2H*-chromene was obtained in 10% only and starting materials were recovered (**Scheme-1**). Since the formation of *2H*-chromene was only 10% and no further reaction was observed to form the spiro compound.

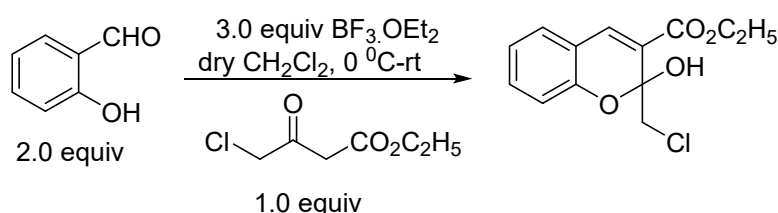

**Scheme-1**

B)  $\text{BF}_3 \cdot \text{OEt}_2$  (3.0 equiv) was added to a stirred solution of ethyl 4-chloroacetoacetate (1.0 equiv) in dry  $\text{CH}_2\text{Cl}_2$  at 0 °C under nitrogen atmosphere in presence of 4 Å molecular sieves and reaction was continued for 30 minutes. No colour change was observed in the reaction mixture. The salicylaldehyde (2.0 equiv) in dry  $\text{CH}_2\text{Cl}_2$  was added slowly to the reaction mixture at the same temperature. The reaction was monitored by TLC and found no reaction was occurred even after 24 hours. All the starting materials were recovered (**Scheme-2**).

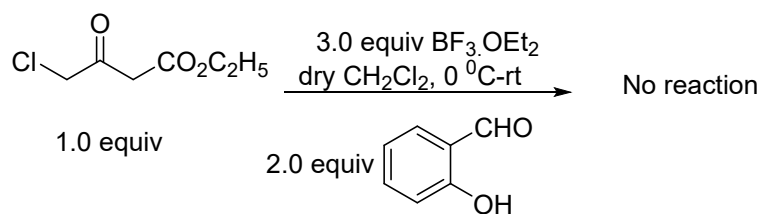

**Scheme-2**

C) The ethyl 2-(chloromethyl)-2-hydroxy-2*H*-chromene-3-carboxylates were reported by the reaction of salicylaldehydes with ethyl 4-chloroacetoacetate in presence of piperidine in dry DCM solvent (**Scheme-3**, *Helv. Chim. Acta.*, 2011, **94**, 248-253).

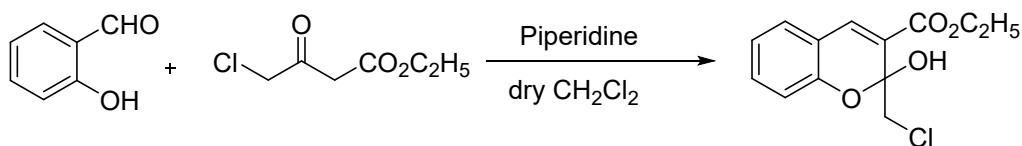

**Scheme-3**

Based on the above reactions, the one-pot reaction between salicylaldehyde and ethyl 4-chloroacetoacetate could not provide the ethyl 2-(chloromethyl)-2-hydroxy-2*H*-chromene-3-carboxylate in presence of  $\text{BF}_3\cdot\text{OEt}_2$ . The reaction is base catalyzed as depicted in Scheme-3 to provide ethyl 2-(chloromethyl)-2-hydroxy-2*H*-chromene-3-carboxylate.
